# Supplementary material for: The importance of urban natural areas and urban ecosystem services during the COVID-19 pandemic
Source: PubMed Central journal article supplement (PMC7746267; doi:10.1371/journal.pone.0243344), 2020-12-17
Supplement: pone.0243344.s002.pdf [file pone.0243344.s002.pdf]

## Natural Areas Survey Questions

1. Which natural areas do you regularly visit?

2. Before COVID-19, how often would you typically visit these areas?

- Never       1-2 times per year       1-2 times per month       1-2 times per week  
 3-6 times per week       Daily

3. Has the frequency of your visits changed since the COVID-19 pandemic?

- Greatly decreased       Decreased       No change       Increased       Greatly increased

4. How important are these natural areas to you?

- Unimportant       Not very important       Neutral       Important       Very important

5. Has the importance of visiting natural areas changed for you since the COVID-19 pandemic?

- Greatly decreased       Decreased       No change       Increased       Greatly increased

6. Before COVID-19, how many people would you typically visit these areas with, INCLUDING yourself?

- 1       2       3-4       5 or more

7. Has the number of people you visit with changed since the pandemic?

- Decreased       Did not change       Increased

8. What are the key reasons or values for your visits to these natural areas? (Check as many as apply)

- |                                                           |                                                      |
|-----------------------------------------------------------|------------------------------------------------------|
| <input type="checkbox"/> Just getting outside / Fresh air | <input type="checkbox"/> Birding                     |
| <input type="checkbox"/> Exercise                         | <input type="checkbox"/> Time with family / children |
| <input type="checkbox"/> Connecting to nature             | <input type="checkbox"/> Socializing                 |
| <input type="checkbox"/> Peace and quiet                  | <input type="checkbox"/> Fishing                     |
| <input type="checkbox"/> Dog walking                      | <input type="checkbox"/> Other _____                 |
| <input type="checkbox"/> Contemplative space              |                                                      |

9. It would help in our work if you could provide the zip code of where you currently live:

10. Do you want to say anything else? If you would like to see the results of this survey, you may provide your email address.
