# Supplementary material for: The importance of urban natural areas and urban ecosystem services during the COVID-19 pandemic
Source: PLoS One. 2020 Dec 17;15(12):e0243344. doi: 10.1371/journal.pone.0243344 (PMC7746267; doi:10.1371/journal.pone.0243344)
Supplement: S1 Data — (XLSX) [file pone.0243344.s001.xlsx]

## Sheet: Sheet1
Entity	Timestamp	Area	Pre-COVID frequency	Present frequency	Importance	Change of importance	Pre-COVID group	Change of group	Reasons to visit	Zipcode	Comment
UVM	3/28/20 15:03	Centennial Woods	1-2 times per month	increased	5	increased	1		Just getting outside, Exercise, Dog Walking, Socializing	5401	0
UVM	3/28/20 15:27	Centennial Woods	3-6 times per week	increased	5	increased	3		Just getting outside, Exercise, Connecting to nature, Dog Walking	05403 live on valley ridge so it‰Ûªs across street	3
UVM	3/28/20 15:48	Centennial Woods	3-6 times per week	greatly increased	5	increased	1		Just getting outside, Exercise, Peace + Quiet, Dog Walking	5401	0
UVM	3/28/20 15:57	Redstone Quarry	1-2 times per year	increased	4	increased	10		Just getting outside, Exercise, Connecting to nature, Peace + Quiet, Socializing	5401	0
UVM	3/28/20 18:12	Centennial Woods	3-6 times per week	increased	5	increased	2		Just getting outside, Exercise, Dog Walking	5403	0
UVM	3/29/20 9:22	Colchester Bog	1-2 times per year	greatly increased	5	increased	2		Just getting outside, Connecting to nature, Peace + Quiet	5401	1
UVM	3/29/20 10:06	Colchester Bog	1-2 times per year	increased	5	increased	1		Just getting outside, Exercise, Connecting to nature, Peace + Quiet, Birding, Socializing	5401	1
UVM	3/29/20 12:48	Centennial Woods	1-2 times per week	greatly increased	5	no change	3		Just getting outside, Connecting to nature, Peace + Quiet, Dog Walking, Birding	5401	0
UVM	3/29/20 13:02	Centennial Woods	1-2 times per week	no change	5	no change	1		Just getting outside, Exercise, Connecting to nature, Peace + Quiet, Birding	5401	3
UVM	3/29/20 17:51	Centennial Woods	1-2 times per week	greatly increased	5	greatly increased	1		Just getting outside, Exercise, Connecting to nature, Peace + Quiet	5401	0
UVM	3/30/20 17:25	East Woods	3-6 times per week	greatly increased	5	increased	1		Exercise, Connecting to nature, Peace + Quiet, Mental clarity	5403	0
UVM	3/30/20 18:57	Centennial Woods	1-2 times per month	increased	5	greatly increased	2		Just getting outside, Exercise, Connecting to nature, Peace + Quiet, Dog Walking, Birding, Socializing	5401	2
UVM	3/31/20 12:02	Centennial Woods	1-2 times per month	greatly increased	5	greatly increased	1		Just getting outside, Exercise, Connecting to nature, Birding	5403	0
UVM	3/31/20 13:10	Centennial Woods	1-2 times per month	increased	5	no change	1		Just getting outside, Exercise, Peace + Quiet	5401	0
UVM	3/31/20 13:53	Centennial Woods	1-2 times per month	increased	4	increased	1		Just getting outside, Exercise, Peace + Quiet	5403	0
UVM	3/31/20 14:03	Centennial Woods	1-2 times per week	increased	5	increased	2		Just getting outside, Exercise, Connecting to nature, Peace + Quiet	5401	2
UVM	3/31/20 14:58	Centennial Woods	3-6 times per week	no change	5	no change	1		Exercise, Dog Walking	5403	1
UVM	3/31/20 15:47	Centennial Woods	1-2 times per month	greatly increased	5	increased	1		Just getting outside, Exercise, Connecting to nature	5401	0
UVM	3/31/20 16:57	Redstone Quarry	3-6 times per week	increased	5	greatly increased	2		Just getting outside, Connecting to nature, Birding	5401	0
UVM	3/31/20 16:59	East Woods	1-2 times per year	increased	5	increased	1		Just getting outside, Exercise, Connecting to nature, Peace + Quiet, Dog Walking, Socializing	5401	3
UVM	3/31/20 17:16	Redstone Quarry	3-6 times per week	increased	5	greatly increased	2		Just getting outside, Connecting to nature, Birding	5401	0
UVM	3/31/20 17:35	Centennial Woods	1-2 times per month	no change	4	increased	1		Just getting outside, Exercise, Connecting to nature	5401	0
UVM	3/31/20 17:40	Pease Mountain	1-2 times per year	greatly increased	5	no change	2		Just getting outside, Exercise, Connecting to nature, Peace + Quiet, Dog Walking, Socializing	5473	2
UVM	2020-01-04 00:25:00	Redstone Quarry	Did not visit before COVID-19	increased	5	increased	1		Just getting outside, Exercise, Connecting to nature, Time with family	5401	1
UVM	2020-01-04 08:06:00	East Woods	3-6 times per week	no change	5	increased	1		Just getting outside, Connecting to nature, Dog Walking	5401	2
UVM	2020-01-04 08:31:00	Shelburne Pond	Daily	no change	5	increased	1		Just getting outside, Exercise, Connecting to nature, Peace + Quiet, Dog Walking, Paddling	5495	3
UVM	2020-01-04 12:21:00	Colchester Bog	Daily	no change	5	no change	1		Just getting outside, Exercise, Connecting to nature, Peace + Quiet, Dog Walking	5446	0
UVM	2020-01-04 16:53:00	East Woods	3-6 times per week	increased	5	increased	3		Just getting outside, Exercise, Connecting to nature, Peace + Quiet, Dog Walking, Socializing	5403	2
UVM	2020-01-04 17:33:00	Centennial Woods	Daily	no change	5	no change	1		Exercise, Connecting to nature, Peace + Quiet, Dog Walking, Birding	5403	0
UVM	2020-01-04 17:50:00	Centennial Woods	Daily	increased	5	increased	1		Just getting outside, Exercise, Connecting to nature, Peace + Quiet, Birding	5403	1
UVM	2020-01-04 17:52:00	Centennial Woods	3-6 times per week	increased	5	increased	1		Just getting outside, Exercise, Connecting to nature, Peace + Quiet, Dog Walking, Birding	5401	0
UVM	2020-01-04 18:04:00	East Woods	1-2 times per year	increased	5	increased	2		Just getting outside, Exercise, Connecting to nature, Peace + Quiet, Photos	5446	0
UVM	2020-01-04 18:45:00	East Woods	1-2 times per year	increased	3	increased	1		Just getting outside, Exercise, Connecting to nature, Peace + Quiet	5401	3
UVM	2020-01-04 20:23:00	Pease Mountain	1-2 times per week	increased	5	increased	2		Just getting outside, Exercise, Connecting to nature, Peace + Quiet, Dog Walking, Socializing	5469	1
UVM	2020-01-04 21:27:00	East Woods	1-2 times per month	no change	4	increased	1		Just getting outside, Exercise, Connecting to nature, Peace + Quiet, Birding	5403	0
UVM	2020-02-04 08:16:00	Pease Mountain	3-6 times per week	no change	5	increased	1		Just getting outside, Exercise, Connecting to nature, Dog Walking	5445	2
UVM	2020-02-04 12:31:00	Shelburne Pond	1-2 times per week	no change	4	increased	2		Just getting outside, Connecting to nature, Dog Walking	5461	1
UVM	2020-02-04 12:55:00	Centennial Woods	1-2 times per year	no change	4	increased	1		Just getting outside, Exercise, Connecting to nature, Birding	5401	0
UVM	2020-02-04 13:11:00	East Woods	3-6 times per week	greatly increased	5	increased	4		Just getting outside, Exercise, Connecting to nature, Peace + Quiet, Birding, Educating grandchildren about nature. Even the four year olds are able to spot and marvel at the pileated woodpecker	5401	3
UVM	2020-02-04 14:42:00	Shelburne Pond	Did not visit before COVID-19	increased	5	increased	4		Just getting outside, Exercise, Connecting to nature, Peace + Quiet, Gym class	5445	1
UVM	2020-02-04 15:53:00	Centennial Woods	3-6 times per week	increased	5	increased	3		Just getting outside, Exercise, Peace + Quiet, Dog Walking	5401	0
UVM	2020-03-04 10:04:00	East Woods	Daily	no change	5	increased	1		Just getting outside, Exercise, Connecting to nature, Peace + Quiet, Dog Walking, Birding	5403	1
UVM	2020-03-04 11:10:00	East Woods	1-2 times per year	no change	5	increased	1		Just getting outside, Exercise, Connecting to nature, Peace + Quiet, Birding, Socializing	5401	0
UVM	2020-03-04 14:57:00	Centennial Woods	Did not visit before COVID-19	no change	5	no change	1		Just getting outside, Exercise, Connecting to nature, Peace + Quiet, Fresh air	5403	2
UVM	2020-03-04 15:18:00	Shelburne Pond	Did not visit before COVID-19	increased	5	increased	1		Just getting outside, Connecting to nature	5403	0
UVM	2020-03-04 21:33:00	East Woods	3-6 times per week	no change	5	increased	1		Just getting outside, Exercise, Connecting to nature, Peace + Quiet, Dog Walking	5401	1
UVM	2020-04-04 09:43:00	East Woods	3-6 times per week	greatly increased	5	greatly increased	3		Just getting outside, Exercise, Connecting to nature, Peace + Quiet, Dog Walking	5401	3
UVM	2020-04-04 10:19:00	Centennial Woods	1-2 times per year	greatly increased	5	increased	4		Just getting outside, Exercise	5403	0
UVM	2020-04-04 10:33:00	Carse Wetlands	1-2 times per year	no change	4	increased	1		Just getting outside, Connecting to nature, Peace + Quiet, Birding	5461	1
UVM	2020-04-04 10:51:00	East Woods	Daily	no change	5	increased	1		Just getting outside, Exercise, Connecting to nature, Peace + Quiet, Dog Walking	5401	0
UVM	2020-04-04 12:00:00	Centennial Woods	1-2 times per month	increased	5	greatly increased	1		Just getting outside, Exercise, Connecting to nature, Peace + Quiet, Dog Walking	5403	0
UVM	2020-04-04 12:11:00	Shelburne Pond	1-2 times per month	increased	5	greatly increased	4		Exercise, Connecting to nature, Peace + Quiet, Birding, Socializing	5482	2
UVM	2020-04-04 12:45:00	Colchester Bog	Did not visit before COVID-19	decreased	5	increased	1		Just getting outside, Exercise, Connecting to nature, Peace + Quiet, Birding	5408	0
UVM	2020-04-04 14:12:00	Pease Mountain	1-2 times per year	greatly increased	5	increased	3		Just getting outside, Exercise, Connecting to nature, Peace + Quiet, Dog Walking	5445	0
UVM	2020-04-04 16:23:00	Centennial Woods	1-2 times per week	no change	5	no change	1		Just getting outside, Exercise, Connecting to nature, Dog Walking	5401	1
UVM	2020-04-04 17:47:00	Colchester Bog	1-2 times per year	no change	4	increased	2		Just getting outside, Exercise, Connecting to nature, Peace + Quiet, Socializing	5446	0
UVM	2020-04-04 19:34:00	Centennial Woods	Did not visit before COVID-19	no change	4	increased	1		Just getting outside, Exercise, Connecting to nature, Peace + Quiet	48082	0
UVM	2020-05-04 09:29:00	East Woods	1-2 times per year	greatly increased	4	no change	4		Just getting outside, Exercise, Connecting to nature, Peace + Quiet, Dog Walking	5403	0
UVM	2020-05-04 09:59:00	Centennial Woods	1-2 times per week	no change	5	no change	2		Just getting outside, Exercise, Connecting to nature, Peace + Quiet, Dog Walking, Birding	5403	0
UVM	2020-05-04 10:43:00	Centennial Woods	Daily	increased	5	no change	2		Just getting outside, Exercise, Connecting to nature, Peace + Quiet, Dog Walking	5401	2
UVM	2020-05-04 10:44:00	Centennial Woods	3-6 times per week	no change	5	increased	1		Just getting outside, Exercise, Connecting to nature, Peace + Quiet, Dog Walking	5401	0
UVM	2020-05-04 10:58:00	Centennial Woods	1-2 times per year	increased	5	increased	1		Just getting outside, Exercise	5401	0
UVM	2020-05-04 11:36:00	Centennial Woods	Did not visit before COVID-19	increased	5	greatly increased	5		Just getting outside, Exercise, Connecting to nature, Peace + Quiet	5452	0
UVM	2020-05-04 12:02:00	Pease Mountain	Did not visit before COVID-19	no change	3	increased	2		Just getting outside, Exercise, Connecting to nature, Socializing	5462	0
UVM	2020-05-04 15:35:00	Shelburne Pond	Did not visit before COVID-19	increased	5	no change	2		Just getting outside, Exercise, Connecting to nature, Peace + Quiet	5401	0
UVM	2020-05-04 16:55:00	Centennial Woods	3-6 times per week	no change	5	increased	1		Just getting outside, Exercise, Connecting to nature, Peace + Quiet, Socializing	5401	0
UVM	2020-05-04 17:46:00	East Woods	Did not visit before COVID-19	increased	5	increased	2		Just getting outside, Exercise, Connecting to nature, Socializing	5401	2
UVM	2020-05-04 18:18:00	Colchester Bog	1-2 times per week	decreased	4	increased	2		Birding, General naturalist observations	5408	3
UVM	2020-05-04 19:01:00	Centennial Woods	1-2 times per week	increased	5	increased	2		Just getting outside, Connecting to nature, Peace + Quiet, Socializing		0
UVM	2020-06-04 12:13:00	East Woods	1-2 times per week	increased	4	increased	3		Just getting outside, Exercise, Connecting to nature, Dog Walking, Family bonding.	5403	0
UVM	2020-06-04 17:29:00	Carse Wetlands	Did not visit before COVID-19	increased	5	increased	2		Just getting outside, Exercise, Connecting to nature, Birding	5403	0
UVM	2020-07-04 13:09:00	East Woods	1-2 times per week	no change	5	greatly increased	3		Just getting outside, Exercise, Connecting to nature, Peace + Quiet, Children	5403	2
UVM	2020-07-04 21:45:00	Centennial Woods	1-2 times per week	increased	5	increased	1		Just getting outside, Exercise, Connecting to nature, Peace + Quiet	5401	0
UVM	2020-07-04 21:47:00	Centennial Woods	1-2 times per month	increased	5	increased	1		Just getting outside, Exercise, Connecting to nature, Peace + Quiet, Socializing	5401	2
UVM	2020-08-04 08:28:00	Centennial Woods	Did not visit before COVID-19	no change	3	increased	1		Just getting outside, Exercise, Connecting to nature, Peace + Quiet	5401	1
UVM	2020-08-04 12:09:00	Colchester Bog	1-2 times per month	no change	3	no change	1		Just getting outside	5446	0
UVM	2020-08-04 15:08:00	Centennial Woods	Daily	no change	5	no change	2		Just getting outside, Exercise, Connecting to nature, Peace + Quiet, Dog Walking, Socializing	5401	1
UVM	2020-08-04 16:14:00	Pease Mountain	1-2 times per month	greatly increased	5	greatly increased	1		Just getting outside, Exercise, Connecting to nature, Peace + Quiet	5462	0
UVM	2020-08-04 17:00:00	Centennial Woods	1-2 times per week	increased	5	no change	1		Just getting outside, Exercise, Connecting to nature, Peace + Quiet	5401	0
UVM	2020-08-04 17:17:00	Centennial Woods	1-2 times per year	no change	5	no change	1		Connecting to nature, Peace + Quiet, Birding	5401	0
UVM	2020-09-04 15:09:00	Shelburne Pond	3-6 times per week	no change	5	increased	2		Exercise, Connecting to nature, Peace + Quiet, Dog Walking, Birding	05495, St. George, VT	1
UVM	2020-11-04 12:26:00	Shelburne Pond	1-2 times per month	no change	4	increased	1		Just getting outside, Exercise	5403	0
UVM	2020-11-04 13:51:00	Shelburne Pond	1-2 times per week	increased	5	no change	4		Just getting outside, Exercise, Kids, fishing, exploring.	5482	1
UVM	2020-11-04 14:13:00	Centennial Woods	1-2 times per year	no change	5	no change	1		Just getting outside, Exercise, Connecting to nature, Peace + Quiet	5401	0
UVM	2020-11-04 14:29:00	Shelburne Pond	Did not visit before COVID-19	increased	5	no change	3		Just getting outside, Exercise, Connecting to nature	5452	2
UVM	2020-11-04 16:29:00	Shelburne Pond	1-2 times per year	no change	4	no change	4		Connecting to nature, Dog Walking, Birding	5401	2
UVM	2020-11-04 16:40:00	Colchester Bog	1-2 times per year	no change	3	increased	1		Just getting outside, Exercise	5446	0
UVM	2020-11-04 18:14:00	Centennial Woods	1-2 times per month	greatly increased	5	increased	1		Just getting outside, Exercise, Peace + Quiet	5404	0
UVM	2020-12-04 11:13:00	Centennial Woods	1-2 times per year	no change	5	increased	2-Jan		Just getting outside, Exercise, Connecting to nature, Peace + Quiet, Socializing	5401	1
UVM	2020-12-04 15:10:00	Colchester Bog	1-2 times per week	increased	4	increased	1		Just getting outside, Exercise	5446	0
UVM	2020-12-04 20:11:00	Centennial Woods	1-2 times per year	increased	5	no change	1		Just getting outside, Exercise, Connecting to nature, Enjoying nature's beauty.	5403	3
UVM	2020-12-04 20:18:00	Pease Mountain	1-2 times per week	no change	4	no change	3		Just getting outside, Exercise, Dog Walking	5445	0
UVM	4/13/20 8:49	Shelburne Pond	1-2 times per month	no change	4	increased	1		Just getting outside, Exercise	5403	0
UVM	4/13/20 11:13	East Woods	1-2 times per year	increased	5	increased	2		Just getting outside, Exercise, Connecting to nature, Peace + Quiet, Playing with my 2.5 year old son in the woods - imagination	5403	2
UVM	4/14/20 8:31	Centennial Woods	3-6 times per week	greatly increased	5	increased	1		Just getting outside, Connecting to nature, Peace + Quiet	5401	0
UVM	4/14/20 19:08	Colchester Bog	1-2 times per week	no change	5	increased	1		Just getting outside, Exercise, Connecting to nature, Peace + Quiet, Dog Walking, Birding, Socializing	5446	0
UVM	4/15/20 16:26	Centennial Woods	Did not visit before COVID-19	increased	5	increased	1		Just getting outside, Exercise, Connecting to nature, Peace + Quiet, Dog Walking, Birding, Socializing	5403	0
UVM	4/16/20 13:50	Pease Mountain	Did not visit before COVID-19	increased	5	increased	3		Just getting outside, Exercise, Connecting to nature, Peace + Quiet, Birding	5465	1
UVM	4/17/20 18:39	East Woods	1-2 times per week	decreased	5	no change	1		Exercise, Peace + Quiet, Dog Walking	5461	0
UVM	4/18/20 10:38	East Woods	1-2 times per week	increased	5	increased	1		Just getting outside, Exercise, Connecting to nature, Dog Walking	5461	2
UVM	4/18/20 13:18	Centennial Woods	1-2 times per week	increased	5	no change	1		Exercise, Connecting to nature, Peace + Quiet	5401	0
UVM	4/18/20 14:22	Colchester Bog	1-2 times per year	increased	5	no change	2		Just getting outside, Exercise, Connecting to nature, Peace + Quiet	5446	0
UVM	4/18/20 15:09	Shelburne Pond	1-2 times per year	increased	5	increased	1		Just getting outside, Exercise, Connecting to nature	5403	0
UVM	4/18/20 17:06	Pease Mountain	Did not visit before COVID-19	no change	3	greatly increased	2		Just getting outside, Exercise, Connecting to nature	5491	0
UVM	4/19/20 11:33	Pease Mountain	Did not visit before COVID-19	increased	4	increased	2		Just getting outside, Connecting to nature	5403	0
UVM	4/19/20 12:00	Shelburne Pond	3-6 times per week	decreased	5	increased	3		Just getting outside	5495	1
UVM	4/19/20 13:37	Shelburne Pond	1-2 times per month	increased	5	increased	1		Connecting to nature		0
UVM	4/19/20 15:17	Centennial Woods	Did not visit before COVID-19	increased	5	increased	1		Just getting outside, Exercise, Connecting to nature, Peace + Quiet	5403	1
UVM	4/19/20 21:54	Shelburne Pond	1-2 times per month	increased	5	increased	1		Connecting to nature		0
UVM	4/20/20 8:42	East Woods	1-2 times per week	increased	4	increased	3		Just getting outside, Exercise, Connecting to nature, Dog Walking, Family bonding.	5403	0
UVM	4/20/20 11:19	Centennial Woods	Did not visit before COVID-19	greatly increased	5	increased	1		Exercise, Connecting to nature, Peace + Quiet, Dog Walking	5446	2
UVM	4/20/20 12:26	Colchester Bog	Did not visit before COVID-19	increased	4	greatly increased	1		Just getting outside, Connecting to nature, Peace + Quiet	5401	1
UVM	4/20/20 17:17	Colchester Bog	Did not visit before COVID-19	increased	5	no change	1		Just getting outside, Exercise, Connecting to nature, Peace + Quiet, Studying natural communities	5408	0
UVM	4/20/20 22:05	Shelburne Pond	1-2 times per month	no change	5	increased	1		Just getting outside, Exercise, Connecting to nature, Peace + Quiet, Photography	5482	1
UVM	4/21/20 13:24	Centennial Woods	1-2 times per year	increased	4	increased	2		Just getting outside, Exercise, Connecting to nature, Peace + Quiet, Socializing, Tree identification	5401	2
UVM	4/21/20 13:56	Centennial Woods	1-2 times per month	increased	5	increased	1		Just getting outside, Exercise, Connecting to nature	5401	0
UVM	4/21/20 16:52	Colchester Bog	1-2 times per week	increased	5	increased	1		Just getting outside, Exercise, Connecting to nature, Peace + Quiet, Dog Walking	5446	2
UVM	4/21/20 19:42	Shelburne Pond	1-2 times per month	increased	4	increased	1		Just getting outside, Connecting to nature, Peace + Quiet	5401	2
UVM	4/22/20 18:01	Centennial Woods	Did not visit before COVID-19	increased	5	increased	2		Just getting outside, Exercise, Peace + Quiet	5401	0
UVM	4/22/20 20:34	Pease Mountain	Did not visit before COVID-19	increased	5	increased	1		Just getting outside, Exercise, Connecting to nature, Peace + Quiet	5403	0
UVM	4/22/20 20:37	Pease Mountain	Did not visit before COVID-19	increased	5	greatly increased	1		Just getting outside, Exercise, Connecting to nature, Peace + Quiet, Socializing, Exploring. Getting a more complete view of a region I am familiar with.	5403	3
UVM	4/22/20 21:15	Pease Mountain	Did not visit before COVID-19	greatly increased	5	increased	4		Just getting outside, Connecting to nature	5482	3
UVM	4/23/20 18:43	Centennial Woods	1-2 times per year	no change	5	increased	3		Just getting outside, Exercise, Connecting to nature, Birding	5401	0
UVM	4/24/20 8:19	Shelburne Pond	1-2 times per month	decreased	5	no change	1		Exercise, Connecting to nature, Birding	5461	0
UVM	4/24/20 11:08	East Woods	Did not visit before COVID-19	increased	1	no change	1		Just getting outside, Exercise, Connecting to nature, Peace + Quiet, Dog Walking	2878	0
UVM	4/24/20 11:41	Shelburne Pond	1-2 times per month	decreased	5	increased	2		Just getting outside, Exercise, Connecting to nature, Peace + Quiet, Birding, spring wildflowers	5401	3
UVM	4/24/20 14:51	Centennial Woods	1-2 times per year	increased	5	increased	1		Just getting outside, Exercise, Connecting to nature, Dog Walking	5404	0
UVM	4/24/20 20:28	East Woods	Did not visit before COVID-19	greatly increased	5	no change	1		Just getting outside, Exercise, Connecting to nature, Peace + Quiet, Dog Walking	5401	2
UVM	4/25/20 14:04	Shelburne Pond	1-2 times per month	increased	5	increased	3		Just getting outside, Exercise, Socializing	5482	0
UVM	4/25/20 16:48	Centennial Woods	1-2 times per week	increased	4	increased	1		Just getting outside	5403	0
UVM	4/25/20 16:50	Shelburne Pond	1-2 times per year	no change	4	increased	5		Just getting outside, Connecting to nature	5482	0
UVM	4/26/20 2:02	Carse Wetlands	1-2 times per year	increased	2	increased	1		Just getting outside, Connecting to nature, Peace + Quiet	5461	0
UVM	4/26/20 10:59	Shelburne Pond	1-2 times per week	increased	5	no change	3		Just getting outside, Exercise, Connecting to nature, Peace + Quiet	5403	0
UVM	4/26/20 19:23	Centennial Woods	Did not visit before COVID-19	increased	4	no change	1		Just getting outside, Exercise	5461	0
UVM	4/27/20 13:42	Colchester Bog	3-6 times per week	no change	5	no change	2		Just getting outside, Exercise, Connecting to nature, Peace + Quiet, Birding, botany	5446	3
UVM	4/27/20 14:49	Centennial Woods	1-2 times per month	no change	4	greatly increased	1		Just getting outside, Exercise, Connecting to nature, Peace + Quiet, Birding	5401	0
UVM	4/28/20 13:59	Centennial Woods	1-2 times per year	increased	5	increased	1		Just getting outside, Exercise, Connecting to nature, Peace + Quiet	5401	2
UVM	4/28/20 14:52	East Woods	Did not visit before COVID-19	increased	5	no change	3		Just getting outside, Exercise, Connecting to nature, Peace + Quiet, Birding	5408	0
UVM	4/29/20 23:11	Colchester Bog	1-2 times per year	increased	4	increased	2		Just getting outside, Exercise, Socializing	5446	1
UVM	4/30/20 10:31	Centennial Woods	3-6 times per week	greatly increased	5	greatly increased	2		Just getting outside, Exercise, Connecting to nature, Peace + Quiet, Birding, botanizing	5401	1
UVM	4/30/20 13:42	Colchester Bog	Did not visit before COVID-19	no change	4	no change	1		Just getting outside, Exercise, Connecting to nature, Peace + Quiet, Birding	5446	0
UVM	4/30/20 17:09	Centennial Woods	1-2 times per year	increased	5	increased	1		Just getting outside, Exercise, Connecting to nature, Peace + Quiet, Dog Walking, Birding	5401	0
UVM	4/30/20 17:54	Colchester Bog	Daily	no change	5	increased	1		Just getting outside, Exercise, Connecting to nature, Peace + Quiet, Dog Walking	5446	1
UVM	2020-03-05 15:32:00	Pease Mountain	1-2 times per year	increased	5	increased	3		Just getting outside, Exercise, Connecting to nature, Peace + Quiet, Dog Walking, Socializing	5445	3
UVM	2020-03-05 15:33:00	Colchester Bog	Did not visit before COVID-19	greatly increased	3	increased	3		Just getting outside, Exercise	5482	1
UVM	2020-03-05 17:04:00	Centennial Woods	1-2 times per year	increased	5	greatly increased	2		Just getting outside, Connecting to nature, Peace + Quiet, Birding	5401	1
UVM	2020-03-05 20:31:00	Pease Mountain	Did not visit before COVID-19	no change	4	no change	2		Just getting outside, Exercise, Connecting to nature, Peace + Quiet	5401	0
UVM	2020-04-05 09:05:00	Centennial Woods	1-2 times per month	increased	5	increased	2		Just getting outside, Exercise, Connecting to nature, Peace + Quiet, Dog Walking, Birding	5403	2
UVM	2020-05-05 11:03:00	Colchester Bog	1-2 times per year	no change	4	increased	3		Just getting outside, Connecting to nature, Peace + Quiet	5408	0
UVM	2020-05-05 15:27:00	Colchester Bog	1-2 times per week	increased	5	increased	5		Just getting outside, Connecting to nature, Peace + Quiet, Learning with kids	5446	0
UVM	2020-05-05 16:06:00	Pease Mountain	1-2 times per year	increased	5	increased	1		Just getting outside, Exercise, Connecting to nature, Birding	5456	2
UVM	2020-05-05 19:22:00	Shelburne Pond	Did not visit before COVID-19	increased	5	increased	3		Just getting outside, Exercise	5482	1
UVM	2020-07-05 13:17:00	Centennial Woods	Did not visit before COVID-19	no change	3	increased	2		Just getting outside, Exercise, Connecting to nature, Peace + Quiet, Birding, Socializing	5401	0
UVM	2020-08-05 01:10:00	Pease Mountain	Did not visit before COVID-19	increased	5	increased	2		Just getting outside, Exercise, Connecting to nature, Peace + Quiet, Creative inspiration	5445	1
UVM	2020-08-05 17:55:00	Centennial Woods	3-6 times per week	increased	5	no change	1		Just getting outside, Exercise, Connecting to nature, Dog Walking	5401	2
UVM	2020-09-05 16:57:00	Centennial Woods	Did not visit before COVID-19	increased	4	no change	1		Just getting outside, Exercise, Socializing	5401	0
UVM	2020-10-05 14:34:00	Centennial Woods	1-2 times per week	no change	5	increased	1		Connecting to nature, Peace + Quiet, Birding	5401	0
UVM	2020-10-05 16:09:00	East Woods	1-2 times per month	no change	4	increased	1		Just getting outside, Exercise, Connecting to nature, Peace + Quiet	5403	0
UVM	2020-10-05 19:03:00	Centennial Woods	1-2 times per week	increased	5	greatly increased	1		Just getting outside, Exercise, Connecting to nature, Peace + Quiet	5405	0
UVM	2020-10-05 21:17:00	Pease Mountain	Did not visit before COVID-19	greatly increased	5	greatly increased	2		Just getting outside, Exercise, Connecting to nature, Peace + Quiet, Birding	5446	1
UVM	2020-12-05 12:57:00	Shelburne Pond	Did not visit before COVID-19	no change	5	no change	2		Just getting outside, Connecting to nature, Peace + Quiet	5482	0
city	4/20/20 15:15	Arms Forest/Rock Point/North Beach, Crescent Woods, Intervale/Ethan Allen Homestead, Leddy Park	1-2 times per month	greatly increased	5	greatly increased	varied by location	Yes, increased	Just Getting Outside, Fresh Air, Exercise, Connecting to Nature, Contemplative Space, Time with Family/Children, Dog Walking	5408	1
city	4/20/20 15:18	Arms Forest/Rock Point/North Beach, Burlington Wildway Trail (from Salmon Hole to Ethan Allen Park), Colchester Bog, Derway Island/Mayes Landing, Ethan Allen Park, Intervale/Ethan Allen Homestead	1-2 times per week	slightly increased	5	slightly increased	2	No, remained the same	Just Getting Outside, Fresh Air, Exercise, Connecting to Nature, Dog Walking	5446	2
city	4/20/20 15:24	Arms Forest/Rock Point/North Beach, Burlington Wildway Trail (from Salmon Hole to Ethan Allen Park), Centennial Woods/Schmanska Park, Derway Island/Mayes Landing, Ethan Allen Park, Intervale/Ethan Allen Homestead, Leddy Park, Northshore Natural Area/Starr Farm, Oakledge Park, Salmon Hole Park	1-2 times per week	slightly decreased	5	slightly increased	4-Mar	Yes, decreased	Just Getting Outside, Fresh Air, Exercise, Connecting to Nature, Contemplative Space, Peace and Quiet, Time with Family/Children	5408	0
city	4/20/20 15:25	Arms Forest/Rock Point/North Beach, Derway Island/Mayes Landing, Intervale/Ethan Allen Homestead, Oakledge Park, Urban Reserve/311 North Avenue	1-2 times per week	greatly increased	5	greatly increased	4-Mar	Yes, increased	Just Getting Outside, Fresh Air, Exercise, Connecting to Nature, Time with Family/Children	5401	0
city	4/20/20 15:27	Ethan Allen Park, Intervale/Ethan Allen Homestead, Leddy Park	1-2 times per week	slightly decreased	5	slightly increased	2	No, remained the same	Just Getting Outside, Fresh Air, Exercise, Connecting to Nature, Time with Family/Children, Dog Walking	5401	2
city	4/20/20 15:39	Intervale/Ethan Allen Homestead, Red Rocks Park, Waterfront Park, Battery Park	1-2 times per week	no change	5	greatly increased	2	Yes, decreased	Just Getting Outside, Fresh Air, Exercise, Connecting to Nature	5401	1
city	4/20/20 15:44	Arms Forest/Rock Point/North Beach, Burlington Wildway Trail (from Salmon Hole to Ethan Allen Park), East Woods, Ethan Allen Park, Intervale/Ethan Allen Homestead, Oakledge Park, Redstone Quarry, Shelburne Pond, Urban Reserve/311 North Avenue	1-2 times per week	slightly increased	5	greatly increased	4-Mar	No, remained the same	Just Getting Outside, Fresh Air, Exercise, Connecting to Nature, Contemplative Space, Peace and Quiet, Time with Family/Children, Socializing	5401	0
city	4/20/20 15:46	Arms Forest/Rock Point/North Beach, East Woods, Oakledge Park, Redstone Quarry	1-2 times per month	slightly increased	5	no change	4-Mar	Yes, decreased	Just Getting Outside, Fresh Air, Exercise, Connecting to Nature, Time with Family/Children, Dog Walking, Birding	5401	0
city	4/20/20 16:05	Burlington Wildway Trail (from Salmon Hole to Ethan Allen Park), Intervale/Ethan Allen Homestead, Oakledge Park	1-2 times per week	slightly increased	5	slightly increased	1	No, remained the same	Just Getting Outside, Fresh Air, Exercise, Connecting to Nature, Contemplative Space, Peace and Quiet	5401	2
city	4/20/20 16:06	Arms Forest/Rock Point/North Beach, Burlington Wildway Trail (from Salmon Hole to Ethan Allen Park), Ethan Allen Park, Intervale/Ethan Allen Homestead, Leddy Park, Northshore Natural Area/Starr Farm, Shelburne Pond	Daily	slightly increased	5	greatly increased	1	No, remained the same	Exercise, Connecting to Nature, Birding	5401	0
city	4/20/20 16:13	Arms Forest/Rock Point/North Beach, Burlington Wildway Trail (from Salmon Hole to Ethan Allen Park), Ethan Allen Park, Intervale/Ethan Allen Homestead, Leddy Park, Urban Reserve/311 North Avenue	1-2 times per week	no change	5	slightly increased	1	No, remained the same	Just Getting Outside, Fresh Air, Exercise, Dog Walking, Biking	5408	0
city	4/20/20 16:15	Burlington Wildway Trail (from Salmon Hole to Ethan Allen Park), Ethan Allen Park, Intervale/Ethan Allen Homestead, Leddy Park	1-2 times per week	greatly increased	5	slightly increased	2	No, remained the same	Just Getting Outside, Fresh Air, Exercise, Connecting to Nature, Peace and Quiet, Birding	5408	0
city	4/20/20 16:43	Arms Forest/Rock Point/North Beach, Centennial Woods/Schmanska Park, Intervale/Ethan Allen Homestead, Urban Reserve/311 North Avenue	Daily	greatly increased	5	greatly increased	2	No, remained the same	Just Getting Outside, Fresh Air, Exercise, Connecting to Nature, Contemplative Space, Time with Family/Children, Dog Walking	5403	1
city	4/20/20 17:46	Centennial Woods/Schmanska Park, Intervale/Ethan Allen Homestead, Oakledge Park	1-2 times per week	greatly increased	5	greatly increased	2	No, remained the same	Just Getting Outside, Fresh Air, Exercise, Connecting to Nature, Contemplative Space, Time with Family/Children, Dog Walking	5401	0
city	4/20/20 18:09	Burlington Wildway Trail (from Salmon Hole to Ethan Allen Park), Ethan Allen Park, Intervale/Ethan Allen Homestead, Northshore Natural Area/Starr Farm	1-2 times per month	greatly increased	5	slightly increased	4-Mar	Yes, decreased	Just Getting Outside, Fresh Air, Exercise, Connecting to Nature, Contemplative Space, Peace and Quiet, Birding	5408	0
city	4/20/20 18:29	Arms Forest/Rock Point/North Beach, Burlington Wildway Trail (from Salmon Hole to Ethan Allen Park), Centennial Woods/Schmanska Park, East Woods, Ethan Allen Park, Intervale/Ethan Allen Homestead, Leddy Park, Oakledge Park	3-6 times per week	slightly decreased	5	slightly increased	1	No, remained the same	Just Getting Outside, Fresh Air, Exercise, Connecting to Nature, Contemplative Space, Peace and Quiet, Dog Walking, Birding	5446	0
city	4/20/20 18:58	Arms Forest/Rock Point/North Beach, Burlington Wildway Trail (from Salmon Hole to Ethan Allen Park), Intervale/Ethan Allen Homestead	1-2 times per week	greatly increased	5	greatly increased	1	No, remained the same	Just Getting Outside, Fresh Air, Exercise, Connecting to Nature, Dog Walking	5401	0
city	4/20/20 19:23	Ethan Allen Park, Intervale/Ethan Allen Homestead, Leddy Park, Northshore Natural Area/Starr Farm, Urban Reserve/311 North Avenue	3-6 times per week	slightly decreased	5	slightly increased	2	No, remained the same	Just Getting Outside, Fresh Air, Exercise, Connecting to Nature, Peace and Quiet, Time with Family/Children, Socializing, Birding	5408	0
city	4/20/20 19:47	Burlington Wildway Trail (from Salmon Hole to Ethan Allen Park), Centennial Woods/Schmanska Park, Colchester Bog, East Woods, Ethan Allen Park, Intervale/Ethan Allen Homestead, Leddy Park, Oakledge Park, Pease Mountain, Redstone Quarry	1-2 times per week	slightly increased	5	slightly increased	1	No, remained the same	Just Getting Outside, Fresh Air, Exercise, Connecting to Nature, Contemplative Space, Peace and Quiet, Dog Walking, Birding, wildflowers and plants/trees	5401	2
city	4/20/20 20:32	Arms Forest/Rock Point/North Beach, Burlington Wildway Trail (from Salmon Hole to Ethan Allen Park), Centennial Woods/Schmanska Park, Colchester Bog, Derway Island/Mayes Landing, East Woods, Ethan Allen Park, Intervale/Ethan Allen Homestead, Oakledge Park, Redstone Quarry, Shelburne Pond, Urban Reserve/311 North Avenue	1-2 times per week	greatly increased	5	greatly increased	2	No, remained the same	Just Getting Outside, Fresh Air, Exercise, Connecting to Nature, Contemplative Space, Peace and Quiet	5401	2
city	4/20/20 20:36	Arms Forest/Rock Point/North Beach, Burlington Wildway Trail (from Salmon Hole to Ethan Allen Park), Centennial Woods/Schmanska Park, East Woods, Intervale/Ethan Allen Homestead, Leddy Park, Redstone Quarry, Salmon Hole Park	1-2 times per week	greatly increased	5	greatly increased	2	No, remained the same	Just Getting Outside, Fresh Air, Exercise, Connecting to Nature, Peace and Quiet	5401	0
city	4/21/20 6:01	Burlington Wildway Trail (from Salmon Hole to Ethan Allen Park), Colchester Bog, Ethan Allen Park, Intervale/Ethan Allen Homestead	1-2 times per month	greatly decreased	5	no change	4-Mar	Yes, decreased	Just Getting Outside, Fresh Air, Exercise, Connecting to Nature, Time with Family/Children, Birding	5446	0
city	4/21/20 9:01	Arms Forest/Rock Point/North Beach, Intervale/Ethan Allen Homestead, Oakledge Park, Bolton valley	1-2 times per month	slightly increased	5	slightly increased	4-Mar	Yes, decreased	Just Getting Outside, Fresh Air, Exercise, Connecting to Nature	5401	2
city	4/21/20 11:41	Arms Forest/Rock Point/North Beach, Burlington Wildway Trail (from Salmon Hole to Ethan Allen Park), Intervale/Ethan Allen Homestead, Long Pond/Sea Caves	1-2 times per week	greatly increased	5	greatly increased	2	Yes, increased	Just Getting Outside, Fresh Air, Exercise, Connecting to Nature, Time with Family/Children, Dog Walking	5401	0
city	4/21/20 12:17	Arms Forest/Rock Point/North Beach, Burlington Wildway Trail (from Salmon Hole to Ethan Allen Park), Ethan Allen Park, Intervale/Ethan Allen Homestead, Leddy Park, Long Pond/Sea Caves, Salmon Hole Park, Shelburne Pond, Urban Reserve/311 North Avenue	1-2 times per week	slightly increased	5	slightly increased	4-Mar	No, remained the same	Just Getting Outside, Fresh Air, Exercise, Connecting to Nature, Contemplative Space, Peace and Quiet, Time with Family/Children, Dog Walking	5401	0
city	4/22/20 17:40	Burlington Wildway Trail (from Salmon Hole to Ethan Allen Park), Ethan Allen Park, Intervale/Ethan Allen Homestead	3-6 times per week	no change	5	slightly increased	1	No, remained the same	Just Getting Outside, Fresh Air, Exercise, Connecting to Nature	5408	0
city	4/23/20 14:23	Arms Forest/Rock Point/North Beach, Ethan Allen Park, Intervale/Ethan Allen Homestead, Oakledge Park	1-2 times per week	slightly increased	5	greatly increased	2	Yes, decreased	Just Getting Outside, Fresh Air, Exercise, Connecting to Nature, Contemplative Space, Peace and Quiet, Dog Walking	5401	0
city	4/23/20 20:53	Arms Forest/Rock Point/North Beach, Leddy Park, Oakledge Park, Rosetti Area, others I don't know name of	1-2 times per month	greatly increased	5	greatly increased	1	No, remained the same	Just Getting Outside, Fresh Air, Exercise, Contemplative Space, Seeing flowers I've never seen before	5446	1
city	4/24/20 7:28	Arms Forest/Rock Point/North Beach, Ethan Allen Park, Leddy Park, Long Pond/Sea Caves, Oakledge Park	1-2 times per week	greatly increased	5	slightly increased	2	No, remained the same	Just Getting Outside, Fresh Air, Exercise, Connecting to Nature, Contemplative Space, Peace and Quiet, Dog Walking	5408	0
city	4/24/20 13:37	Burlington Wildway Trail (from Salmon Hole to Ethan Allen Park), Intervale/Ethan Allen Homestead, Pease Mountain	3-6 times per week	greatly decreased	5	no change	1	No, remained the same	Just Getting Outside, Fresh Air, Exercise, Connecting to Nature, Peace and Quiet, Dog Walking	5404	0
city	4/24/20 13:45	Burlington Wildway Trail (from Salmon Hole to Ethan Allen Park), East Woods, Pease Mountain, Shelburne Pond	1-2 times per week	no change	5	no change	4-Mar	Yes, increased	Exercise, Dog Walking	5473	4
city	4/24/20 13:46	Intervale/Ethan Allen Homestead, Shelburne Pond	1-2 times per year	no change	5	slightly increased	1	No, remained the same	Just Getting Outside, Fresh Air, Exercise, Connecting to Nature, Contemplative Space, Peace and Quiet, Birding	5676	0
city	4/24/20 13:48	Arms Forest/Rock Point/North Beach, Burlington Wildway Trail (from Salmon Hole to Ethan Allen Park), Derway Island/Mayes Landing, Ethan Allen Park, Intervale/Ethan Allen Homestead	Daily	slightly increased	5	slightly increased	1	No, remained the same	Connecting to Nature, Peace and Quiet, Birding, *peace and quiet until an off-leash dog shows up	5408	3
city	4/24/20 13:57	Burlington Wildway Trail (from Salmon Hole to Ethan Allen Park), Intervale/Ethan Allen Homestead, Oakledge Park	1-2 times per week	no change	5	slightly increased	2	No, remained the same	Just Getting Outside, Fresh Air, Exercise, Connecting to Nature, Contemplative Space, Peace and Quiet	5401	0
city	4/24/20 14:08	Burlington Wildway Trail (from Salmon Hole to Ethan Allen Park), Intervale/Ethan Allen Homestead, Leddy Park, Oakledge Park	1-2 times per week	greatly decreased	5	greatly increased	2	Yes, decreased	Just Getting Outside, Fresh Air, Exercise, Peace and Quiet	1719	1
city	4/24/20 14:09	Niquette Bay State Park and Button Bay State Park	1-2 times per year	greatly increased	5	greatly increased	2	Yes, decreased	Just Getting Outside, Fresh Air, Exercise, Contemplative Space, Time away from my roommates	5733	0
city	4/24/20 14:09	Burlington Wildway Trail (from Salmon Hole to Ethan Allen Park), Centennial Woods/Schmanska Park, Ethan Allen Park, Intervale/Ethan Allen Homestead, Leddy Park	1-2 times per month	slightly increased	5	greatly increased	1	No, remained the same	Just Getting Outside, Fresh Air, Exercise, Connecting to Nature, Contemplative Space, Peace and Quiet, Time with Family/Children, Socializing, Birding	5404	0
city	4/24/20 14:11	Arms Forest/Rock Point/North Beach, Burlington Wildway Trail (from Salmon Hole to Ethan Allen Park), Derway Island/Mayes Landing, Ethan Allen Park, Intervale/Ethan Allen Homestead, Leddy Park, Long Pond/Sea Caves, Mount Calvary Red Maple Wetland, Redstone Quarry	1-2 times per week	slightly increased	5	slightly increased	2	No, remained the same	Just Getting Outside, Fresh Air, Exercise, Connecting to Nature, Contemplative Space, Peace and Quiet, Birding	5408	0
city	4/24/20 14:38	Burlington Wildway Trail (from Salmon Hole to Ethan Allen Park), East Woods, Intervale/Ethan Allen Homestead, Shelburne Pond	1-2 times per month	slightly increased	5	greatly increased	1	No, remained the same	Just Getting Outside, Fresh Air, Connecting to Nature, Contemplative Space, Peace and Quiet, Birding	5403	0
city	4/24/20 14:47	Centennial Woods/Schmanska Park, Intervale/Ethan Allen Homestead, Leddy Park	1-2 times per month	greatly decreased	5	slightly increased	2	No, remained the same	Just Getting Outside, Fresh Air, Exercise, Connecting to Nature, Peace and Quiet, Time with Family/Children, Dog Walking, Birding	5680	0
city	4/24/20 14:55	Arms Forest/Rock Point/North Beach, Centennial Woods/Schmanska Park, East Woods, Ethan Allen Park, Intervale/Ethan Allen Homestead, Leddy Park, Oakledge Park, Shelburne Pond	3-6 times per week	slightly increased	5	slightly increased	1	No, remained the same	Just Getting Outside, Fresh Air, Exercise, Connecting to Nature, Contemplative Space, Peace and Quiet, Dog Walking	5403	0
city	4/24/20 16:37	Centennial Woods/Schmanska Park, Colchester Bog, East Woods	1-2 times per week	slightly increased	5	slightly increased	2	Yes, increased	Just Getting Outside, Fresh Air, Exercise, Connecting to Nature, Contemplative Space, Peace and Quiet, Time with Family/Children, Dog Walking, Birding	5446	0
city	4/24/20 16:51	Centennial Woods/Schmanska Park, Ethan Allen Park, Intervale/Ethan Allen Homestead, Oakledge Park, Salmon Hole Park, Shelburne Pond	1-2 times per month	greatly increased	5	greatly increased	1	No, remained the same	Just Getting Outside, Fresh Air, Exercise, Connecting to Nature, Contemplative Space, Peace and Quiet, Birding	5401	0
city	4/24/20 17:30	Arms Forest/Rock Point/North Beach, Burlington Wildway Trail (from Salmon Hole to Ethan Allen Park), Ethan Allen Park, Intervale/Ethan Allen Homestead	1-2 times per week	slightly increased	5	no change	2	No, remained the same	Just Getting Outside, Fresh Air, Exercise, Connecting to Nature, Dog Walking	5408	0
city	4/24/20 20:20	Derway Island/Mayes Landing, Ethan Allen Park, Intervale/Ethan Allen Homestead, Delta Park	1-2 times per month	slightly increased	5	slightly increased	2	Yes, decreased	Just Getting Outside, Fresh Air, Exercise, Connecting to Nature, Peace and Quiet, Birding, Looking for any and all animals and flora	5408	2
city	4/24/20 21:33	Arms Forest/Rock Point/North Beach, Ethan Allen Park, Intervale/Ethan Allen Homestead, Leddy Park	1-2 times per week	slightly increased	5	slightly increased	1	No, remained the same	Exercise, Connecting to Nature, Peace and Quiet	5408	3
city	4/24/20 22:27	Arms Forest/Rock Point/North Beach, Long Pond/Sea Caves	1-2 times per month	slightly decreased	5	greatly increased	2	Yes, decreased	Citizen science projects	5452	0
city	4/25/20 8:15	Arms Forest/Rock Point/North Beach, Ethan Allen Park, Heineburg Wetlands, Intervale/Ethan Allen Homestead, Leddy Park, Urban Reserve/311 North Avenue	1-2 times per week	no change	5	no change	2	No, remained the same	Just Getting Outside, Fresh Air, Connecting to Nature, Contemplative Space, Peace and Quiet, Time with Family/Children, Dog Walking, Birding, Fishing	5408	0
city	4/25/20 10:27	Arms Forest/Rock Point/North Beach, Ethan Allen Park, Intervale/Ethan Allen Homestead, Leddy Park	3-6 times per week	greatly decreased	5	no change	2	No, remained the same	Just Getting Outside, Fresh Air, Exercise	5401	0
city	4/25/20 14:33	Arms Forest/Rock Point/North Beach, Oakledge Park	1-2 times per month	greatly increased	5	greatly increased	1	No, remained the same	Just Getting Outside, Fresh Air, Exercise, Connecting to Nature, Contemplative Space, Peace and Quiet	5401	2
city	4/26/20 13:52	Arms Forest/Rock Point/North Beach	Did not visit before COVID-19	slightly increased	5	no change	2	No, remained the same	Just Getting Outside, Fresh Air, Exercise, Connecting to Nature, Contemplative Space, Peace and Quiet	5401	0
city	4/26/20 15:02	Arms Forest/Rock Point/North Beach, Burlington Wildway Trail (from Salmon Hole to Ethan Allen Park), Centennial Woods/Schmanska Park, Ethan Allen Park, Intervale/Ethan Allen Homestead, Leddy Park, Oakledge Park	1-2 times per month	slightly increased	5	slightly increased	2	No, remained the same	Just Getting Outside, Fresh Air, Exercise, Connecting to Nature, Contemplative Space, Peace and Quiet, Time with Family/Children, Dog Walking	5401	0
city	4/26/20 15:12	Arms Forest/Rock Point/North Beach, Ethan Allen Park, Intervale/Ethan Allen Homestead, Salmon Hole Park	1-2 times per week	slightly increased	5	slightly increased	4-Mar	Yes, decreased	Just Getting Outside, Fresh Air, Exercise, Connecting to Nature, Contemplative Space, Peace and Quiet, Time with Family/Children, Socializing, Dog Walking	5401	0
city	4/26/20 16:23	Arms Forest/Rock Point/North Beach, Burlington Wildway Trail (from Salmon Hole to Ethan Allen Park), East Woods, Ethan Allen Park, Leddy Park, Long Pond/Sea Caves, Oakledge Park, Salmon Hole Park	3-6 times per week	slightly increased	5	no change	4-Mar	Yes, decreased	Just Getting Outside, Fresh Air, Exercise, Connecting to Nature, Peace and Quiet, Time with Family/Children, Socializing, Dog Walking, Fishing	5401	0
city	4/26/20 17:21	Arms Forest/Rock Point/North Beach, Burlington Wildway Trail (from Salmon Hole to Ethan Allen Park), Ethan Allen Park, Intervale/Ethan Allen Homestead, Leddy Park, Northshore Natural Area/Starr Farm, Salmon Hole Park	1-2 times per month	greatly increased	5	greatly increased	2	No, remained the same	Just Getting Outside, Fresh Air, Exercise, Connecting to Nature, Contemplative Space, Peace and Quiet, Socializing, Birding	5408	1
city	4/26/20 20:52	Arms Forest/Rock Point/North Beach, Ethan Allen Park, Leddy Park, Northshore Natural Area/Starr Farm, Oakledge Park, Redstone Quarry	1-2 times per month	greatly increased	5	greatly increased	2	Yes, increased	Just Getting Outside, Fresh Air, Exercise, Connecting to Nature, Contemplative Space, Socializing	5446	0
city	4/26/20 20:53	Arms Forest/Rock Point/North Beach, Ethan Allen Park	1-2 times per year	greatly increased	5	greatly increased	4-Mar	Yes, decreased	Just Getting Outside, Fresh Air, Exercise, Connecting to Nature, Peace and Quiet	5446	2
city	4/27/20 12:23	Arms Forest/Rock Point/North Beach, Colchester Bog, Intervale/Ethan Allen Homestead, Leddy Park	3-6 times per week	slightly increased	5	no change	1	No, remained the same	Just Getting Outside, Fresh Air, Exercise, Connecting to Nature, Dog Walking	5401	0
city	4/27/20 17:02	Arms Forest/Rock Point/North Beach, Ethan Allen Park, Intervale/Ethan Allen Homestead, Salmon Hole Park	1-2 times per week	slightly increased	5	slightly increased	4-Mar	Yes, decreased	Just Getting Outside, Fresh Air, Exercise, Connecting to Nature, Contemplative Space, Peace and Quiet, Time with Family/Children, Socializing, Dog Walking	5401	0
city	4/27/20 22:11	Arms Forest/Rock Point/North Beach, Crescent Woods, Ethan Allen Park, Intervale/Ethan Allen Homestead, Leddy Park	3-6 times per week	slightly increased	5	slightly increased	4-Mar	Depends on day and time	Just Getting Outside, Fresh Air, Exercise, Connecting to Nature, Contemplative Space, Peace and Quiet, Socializing	5408	0
city	4/28/20 14:49	Arms Forest/Rock Point/North Beach, Burlington Wildway Trail (from Salmon Hole to Ethan Allen Park), Crescent Woods, Ethan Allen Park, Intervale/Ethan Allen Homestead, Mount Calvary Red Maple Wetland, Salmon Hole Park, Urban Reserve/311 North Avenue	3-6 times per week	slightly increased	5	slightly increased	1	No, remained the same	Just Getting Outside, Fresh Air, Exercise, Connecting to Nature, Contemplative Space, Peace and Quiet, Time with Family/Children, Birding	5401	1
city	4/28/20 16:10	Arms Forest/Rock Point/North Beach, Colchester Bog, Ethan Allen Park, Oakledge Park, Redstone Quarry, State parks, Woodside Natural Area	1-2 times per week	greatly increased	5	no change	2	Yes, decreased	Just Getting Outside, Fresh Air, Exercise, Connecting to Nature, Contemplative Space, Peace and Quiet	5446	2
city	4/28/20 18:22	Arms Forest/Rock Point/North Beach, Oakledge Park, Shelburne Pond	1-2 times per week	greatly increased	5	greatly increased	2	Yes, decreased	Just Getting Outside, Fresh Air, Exercise, Connecting to Nature, Contemplative Space	5401	2
city	4/28/20 20:22	Arms Forest/Rock Point/North Beach, Burlington Wildway Trail (from Salmon Hole to Ethan Allen Park), Crescent Woods, Ethan Allen Park, Intervale/Ethan Allen Homestead, Leddy Park, Long Pond/Sea Caves, Mount Calvary Red Maple Wetland, Northshore Natural Area/Starr Farm, Oakledge Park, Pease Mountain, Redstone Quarry, Salmon Hole Park, Urban Reserve/311 North Avenue	1-2 times per month	slightly increased	5	no change	2	Yes, increased	Just Getting Outside, Fresh Air, Exercise, Connecting to Nature, Contemplative Space, Peace and Quiet, Time with Family/Children, Birding	5401	0
city	4/30/20 15:25	Arms Forest/Rock Point/North Beach, Crescent Woods, East Woods, Ethan Allen Park, Intervale/Ethan Allen Homestead, Northshore Natural Area/Starr Farm, Oakledge Park, Redstone Quarry	1-2 times per month	greatly increased	5	greatly increased	2	Yes, decreased	Just Getting Outside, Fresh Air, Exercise, Connecting to Nature, Peace and Quiet	5401	1
city	2020-02-05 10:18:00	Arms Forest/Rock Point/North Beach, Northshore Natural Area/Starr Farm, Urban Reserve/311 North Avenue	1-2 times per week	greatly increased	5	slightly increased	2	No, remained the same	Just Getting Outside, Fresh Air, Exercise, Connecting to Nature, Contemplative Space, Peace and Quiet, Time with Family/Children, Birding	5408	3
city	2020-02-05 11:11:00	Arms Forest/Rock Point/North Beach, Burlington Wildway Trail (from Salmon Hole to Ethan Allen Park), Ethan Allen Park, Leddy Park, Long Pond/Sea Caves	1-2 times per month	slightly increased	5	slightly increased	2	No, remained the same	Just Getting Outside, Fresh Air, Exercise, Connecting to Nature, Peace and Quiet	5401	2
city	2020-02-05 12:50:00	Arms Forest/Rock Point/North Beach, Burlington Wildway Trail (from Salmon Hole to Ethan Allen Park), East Woods, Ethan Allen Park, Intervale/Ethan Allen Homestead, Leddy Park, Northshore Natural Area/Starr Farm	3-6 times per week	slightly increased	5	greatly increased	4-Mar	No, remained the same	Just Getting Outside, Fresh Air, Exercise, Connecting to Nature, Time with Family/Children, Dog Walking, Birding	5408	1
city	2020-03-05 15:55:00	Arms Forest/Rock Point/North Beach, Oakledge Park, Pease Mountain	1-2 times per year	greatly increased	5	greatly increased	2	Yes, increased	Just Getting Outside, Fresh Air, Exercise, Connecting to Nature, Contemplative Space, Peace and Quiet, Birding	5403	1
city	2020-03-05 16:48:00	Arms Forest/Rock Point/North Beach, Intervale/Ethan Allen Homestead, Oakledge Park, Shelburne Pond, Urban Reserve/311 North Avenue	1-2 times per month	greatly increased	5	greatly increased	1	Yes, increased	Just Getting Outside, Fresh Air, Exercise, Connecting to Nature, Contemplative Space, Peace and Quiet, Time with Family/Children	5602	2
city	2020-03-05 16:50:00	Arms Forest/Rock Point/North Beach, Leddy Park, Salmon Hole Park, Urban Reserve/311 North Avenue	1-2 times per week	greatly increased	5	greatly increased	2	Yes, increased	Just Getting Outside, Fresh Air, Exercise, Connecting to Nature, Peace and Quiet, Socializing, Mental health/wellness	5408	0
city	2020-04-05 14:53:00	Burlington Wildway Trail (from Salmon Hole to Ethan Allen Park), Centennial Woods/Schmanska Park, Derway Island/Mayes Landing, Ethan Allen Park, Intervale/Ethan Allen Homestead, Oakledge Park, Redstone Quarry, Urban Reserve/311 North Avenue, Redrocks is south Burlington	1-2 times per week	greatly increased	5	greatly increased	4-Mar	Yes, increased	Just Getting Outside, Fresh Air, Exercise, Connecting to Nature, Contemplative Space, Peace and Quiet, Time with Family/Children, Socializing, Birding	5401	0
city	2020-07-05 15:21:00	Arms Forest/Rock Point/North Beach, Burlington Wildway Trail (from Salmon Hole to Ethan Allen Park), Ethan Allen Park, Intervale/Ethan Allen Homestead, Leddy Park, Northshore Natural Area/Starr Farm	1-2 times per week	slightly increased	5	no change	4-Mar	No, remained the same	Just Getting Outside, Fresh Air, Exercise, Connecting to Nature, Time with Family/Children, Dog Walking	5408	0
city	2020-07-05 15:26:00	Arms Forest/Rock Point/North Beach, Burlington Wildway Trail (from Salmon Hole to Ethan Allen Park), East Woods, Intervale/Ethan Allen Homestead, Oakledge Park	1-2 times per month	greatly increased	5	slightly increased	4-Mar	Yes, decreased	Just Getting Outside, Fresh Air, Exercise, Connecting to Nature, Contemplative Space, Peace and Quiet	5401	1
city	2020-07-05 15:29:00	Arms Forest/Rock Point/North Beach, Colchester Bog, Derway Island/Mayes Landing, Ethan Allen Park, Intervale/Ethan Allen Homestead, Leddy Park, Northshore Natural Area/Starr Farm, Salmon Hole Park	1-2 times per month	greatly increased	5	greatly increased	2	Yes, increased	Just Getting Outside, Fresh Air, Exercise, Connecting to Nature, Contemplative Space, Dog Walking, Birding	5408	1
city	2020-07-05 18:25:00	Arms Forest/Rock Point/North Beach, Colchester Bog, Ethan Allen Park, Intervale/Ethan Allen Homestead, Leddy Park, Northshore Natural Area/Starr Farm, Oakledge Park	1-2 times per week	no change	5	slightly increased	2	No, remained the same	Just Getting Outside, Fresh Air, Exercise, Connecting to Nature, Dog Walking	5498	1
city	2020-07-05 20:17:00	Arms Forest/Rock Point/North Beach, Burlington Wildway Trail (from Salmon Hole to Ethan Allen Park), Ethan Allen Park, Intervale/Ethan Allen Homestead, Leddy Park, Long Pond/Sea Caves, Northshore Natural Area/Starr Farm, Oakledge Park	1-2 times per week	greatly increased	5	slightly increased	2	No, remained the same	Just Getting Outside, Fresh Air, Exercise, Connecting to Nature, Contemplative Space, Peace and Quiet, Time with Family/Children	5408	0
city	2020-08-05 08:42:00	Arms Forest/Rock Point/North Beach, Northshore Natural Area/Starr Farm, Urban Reserve/311 North Avenue	Daily	no change	5	slightly increased	1	No, remained the same	Just Getting Outside, Fresh Air, Contemplative Space, Peace and Quiet, Dog Walking	5401	3
city	2020-08-05 08:42:00	Crescent Woods, East Woods, Redstone Quarry, Shelburne Pond	1-2 times per month	slightly increased	5	slightly increased	1	No, remained the same	Just Getting Outside, Fresh Air, Connecting to Nature, Dog Walking	5401	1
city	2020-08-05 09:03:00	Northshore Natural Area/Starr Farm	3-6 times per week	slightly increased	5	slightly increased	1	No, remained the same	Just Getting Outside, Fresh Air, Exercise, Connecting to Nature, Contemplative Space, Peace and Quiet, Dog Walking, Birding	5408	0
city	2020-08-05 10:36:00	Arms Forest/Rock Point/North Beach, Burlington Wildway Trail (from Salmon Hole to Ethan Allen Park), Centennial Woods/Schmanska Park, Derway Island/Mayes Landing, Intervale/Ethan Allen Homestead, Shelburne Pond	1-2 times per week	slightly increased	5	slightly increased	1	No, remained the same	Connecting to Nature, Peace and Quiet, Dog Walking	5408	0
city	2020-08-05 11:15:00	Crescent Woods, Ethan Allen Park, Intervale/Ethan Allen Homestead, Oakledge Park, Redstone Quarry, Shelburne Pond	1-2 times per week	slightly increased	5	slightly increased	1	No, remained the same	Just Getting Outside, Fresh Air, Exercise, Connecting to Nature, Contemplative Space, Dog Walking	5401	0
city	2020-08-05 11:17:00	Crescent Woods, Ethan Allen Park, Intervale/Ethan Allen Homestead, Oakledge Park, Redstone Quarry, Shelburne Pond	1-2 times per week	slightly increased	5	slightly increased	1	No, remained the same	Just Getting Outside, Fresh Air, Exercise, Connecting to Nature, Contemplative Space, Dog Walking	5401	0
city	2020-08-05 15:21:00	Burlington Wildway Trail (from Salmon Hole to Ethan Allen Park), Ethan Allen Park, Intervale/Ethan Allen Homestead	1-2 times per year	greatly increased	5	greatly increased	2	Yes, decreased	Just Getting Outside, Fresh Air, Exercise, Connecting to Nature, Peace and Quiet	5408	0
city	2020-08-05 15:23:00	Burlington Wildway Trail (from Salmon Hole to Ethan Allen Park), Centennial Woods/Schmanska Park, Intervale/Ethan Allen Homestead, Rock point	1-2 times per month	greatly increased	5	greatly increased	1	No, remained the same	Just Getting Outside, Fresh Air, Exercise, Connecting to Nature, Contemplative Space, Peace and Quiet, Birding	5401	1
city	2020-08-05 16:53:00	Arms Forest/Rock Point/North Beach	1-2 times per month	slightly increased	5	greatly increased	1	Yes, decreased	Just Getting Outside, Fresh Air, Exercise, Connecting to Nature, Contemplative Space, Peace and Quiet	5408	0
city	2020-08-05 17:32:00	Arms Forest/Rock Point/North Beach, Burlington Wildway Trail (from Salmon Hole to Ethan Allen Park), Centennial Woods/Schmanska Park, Ethan Allen Park, Intervale/Ethan Allen Homestead, Leddy Park, Long Pond/Sea Caves	1-2 times per month	greatly increased	5	slightly increased	2	Yes, increased	Just Getting Outside, Fresh Air, Exercise, Time with Family/Children, Mountain biking	5408	0
city	2020-09-05 08:54:00	Arms Forest/Rock Point/North Beach, Burlington Wildway Trail (from Salmon Hole to Ethan Allen Park), Centennial Woods/Schmanska Park, East Woods, Ethan Allen Park, Intervale/Ethan Allen Homestead, Leddy Park, Oakledge Park, Salmon Hole Park	1-2 times per week	slightly increased	5	slightly decreased	1	No, remained the same	Just Getting Outside, Fresh Air, Exercise, Connecting to Nature, Contemplative Space, Peace and Quiet, Dog Walking	5401	0
city	2020-09-05 09:32:00	Arms Forest/Rock Point/North Beach, Centennial Woods/Schmanska Park, Colchester Bog, Derway Island/Mayes Landing, Ethan Allen Park, Intervale/Ethan Allen Homestead, Leddy Park, Northshore Natural Area/Starr Farm, Urban Reserve/311 North Avenue	1-2 times per week	greatly increased	5	greatly increased	4-Mar	No, remained the same	Just Getting Outside, Fresh Air, Exercise, Connecting to Nature, Time with Family/Children	5408	0
city	2020-09-05 14:11:00	Arms Forest/Rock Point/North Beach, Leddy Park, Oakledge Park, Bike path	3-6 times per week	slightly increased	5	slightly increased	1	No, remained the same	Just Getting Outside, Fresh Air, Exercise, Connecting to Nature, Contemplative Space, Peace and Quiet, Birding, Husband and I walk to discuss decisions	5408	1
city	2020-09-05 15:00:00	Arms Forest/Rock Point/North Beach, Leddy Park, Waterfront bike path	3-6 times per week	slightly increased	5	no change	1	No, remained the same	Just Getting Outside, Fresh Air, Exercise, Connecting to Nature, Peace and Quiet	5401	0
city	2020-09-05 15:04:00	Arms Forest/Rock Point/North Beach, Ethan Allen Park, Intervale/Ethan Allen Homestead, Long Pond/Sea Caves	1-2 times per week	greatly increased	5	slightly increased	1	No, remained the same	Just Getting Outside, Fresh Air, Exercise, Connecting to Nature, Contemplative Space, Peace and Quiet	5401	0
city	2020-09-05 16:31:00	Arms Forest/Rock Point/North Beach, Burlington Wildway Trail (from Salmon Hole to Ethan Allen Park), Derway Island/Mayes Landing, Ethan Allen Park, Intervale/Ethan Allen Homestead, Northshore Natural Area/Starr Farm, Pease Mountain, Shelburne Pond, Eagle Mountain!	1-2 times per month	no change	5	greatly increased	4-Mar	Yes, decreased	Just Getting Outside, Fresh Air, Exercise, Connecting to Nature, Peace and Quiet, Time with Family/Children, Birding	5408	0
city	2020-09-05 16:58:00	Arms Forest/Rock Point/North Beach, Burlington Wildway Trail (from Salmon Hole to Ethan Allen Park), Centennial Woods/Schmanska Park, East Woods, Ethan Allen Park, Intervale/Ethan Allen Homestead, Leddy Park, Oakledge Park, Redstone Quarry	Daily	slightly increased	5	slightly increased	1	Yes, increased	Just Getting Outside, Fresh Air, Exercise, Connecting to Nature, Contemplative Space, Time with Family/Children, Dog Walking, Birding, Botanizing	5401	0
city	2020-09-05 17:04:00	Redstone Quarry	1-2 times per week	no change	5	slightly increased	2	No, remained the same	Just Getting Outside, Fresh Air, Exercise, Connecting to Nature		0
city	2020-09-05 18:53:00	Arms Forest/Rock Point/North Beach, Burlington Wildway Trail (from Salmon Hole to Ethan Allen Park), Centennial Woods/Schmanska Park, East Woods, Intervale/Ethan Allen Homestead, Leddy Park, Oakledge Park, Shelburne Pond	1-2 times per week	greatly increased	5	greatly increased	1	No, remained the same	Just Getting Outside, Fresh Air, Exercise, Connecting to Nature, Contemplative Space, Peace and Quiet, Dog Walking	5401	0
city	2020-09-05 19:24:00	Redstone Quarry	1-2 times per week	no change	5	slightly increased	2	No, remained the same	Just Getting Outside, Fresh Air, Exercise, Connecting to Nature		0
city	2020-10-05 10:56:00	Arms Forest/Rock Point/North Beach, Burlington Wildway Trail (from Salmon Hole to Ethan Allen Park), Centennial Woods/Schmanska Park, Ethan Allen Park, Intervale/Ethan Allen Homestead, Leddy Park, Oakledge Park, Pease Mountain, Redstone Quarry, Shelburne Pond	1-2 times per month	slightly increased	5	greatly increased	4-Mar	Yes, decreased	Just Getting Outside, Fresh Air, Exercise, Connecting to Nature, Contemplative Space, Socializing	5401	0
city	2020-10-05 12:35:00	Oakledge Park, Redstone Quarry	1-2 times per month	no change	5	greatly increased	2	Yes, decreased	Just Getting Outside, Fresh Air, Connecting to Nature, Peace and Quiet	5401	0
city	2020-10-05 13:14:00	Arms Forest/Rock Point/North Beach, Intervale/Ethan Allen Homestead, Urban Reserve/311 North Avenue	1-2 times per week	slightly increased	5	greatly increased	2	No, remained the same	Just Getting Outside, Fresh Air, Exercise, Connecting to Nature, Contemplative Space, Peace and Quiet	5401	0
city	2020-10-05 15:56:00	Arms Forest/Rock Point/North Beach, Burlington Wildway Trail (from Salmon Hole to Ethan Allen Park), Centennial Woods/Schmanska Park, Ethan Allen Park, Intervale/Ethan Allen Homestead, Leddy Park, Oakledge Park	1-2 times per month	greatly increased	5	greatly increased	4-Mar	No, remained the same	Just Getting Outside, Fresh Air, Exercise, Connecting to Nature, Peace and Quiet, Time with Family/Children	5401	0
city	2020-10-05 16:11:00	Arms Forest/Rock Point/North Beach, Burlington Wildway Trail (from Salmon Hole to Ethan Allen Park), Centennial Woods/Schmanska Park, Colchester Bog, Intervale/Ethan Allen Homestead, Leddy Park, Oakledge Park, Pease Mountain, Salmon Hole Park	1-2 times per week	slightly increased	5	greatly increased	2	No, remained the same	Just Getting Outside, Fresh Air, Exercise, Connecting to Nature, Contemplative Space, Peace and Quiet, Socializing, Dog Walking	5401	0
city	2020-10-05 16:12:00	Crescent Woods, Oakledge Park	1-2 times per month	no change	4	greatly increased	4-Mar	No, remained the same	Just Getting Outside, Fresh Air, Exercise, Connecting to Nature, Contemplative Space	5401	0
city	2020-10-05 17:54:00	Crescent Woods, Intervale/Ethan Allen Homestead, Oakledge Park	3-6 times per week	greatly decreased	5	greatly increased	2	No, remained the same	Just Getting Outside, Fresh Air, Exercise, Connecting to Nature, Contemplative Space, Peace and Quiet, Time with Family/Children, Dog Walking, Birding	5401	2
city	2020-10-05 18:48:00	Arms Forest/Rock Point/North Beach, Ethan Allen Park, Intervale/Ethan Allen Homestead	1-2 times per year	greatly increased	5	greatly increased	4-Mar	Yes, decreased	Just Getting Outside, Fresh Air, Exercise, Connecting to Nature, Peace and Quiet, Time with Family/Children, Socializing	5401	2
city	2020-10-05 20:16:00	Arms Forest/Rock Point/North Beach, Burlington Wildway Trail (from Salmon Hole to Ethan Allen Park), Ethan Allen Park, Intervale/Ethan Allen Homestead, Leddy Park, Oakledge Park, Redstone Quarry, Salmon Hole Park	1-2 times per week	greatly increased	5	greatly increased	2	No, remained the same	Just Getting Outside, Fresh Air, Exercise, Connecting to Nature, Contemplative Space, Peace and Quiet, Socializing	5401	1
city	2020-10-05 22:19:00	Arms Forest/Rock Point/North Beach, Intervale/Ethan Allen Homestead, Northshore Natural Area/Starr Farm	3-6 times per week	slightly increased	5	greatly increased	2	Yes, increased	Just Getting Outside, Fresh Air, Exercise, Connecting to Nature, Contemplative Space, Peace and Quiet, Time with Family/Children, Dog Walking	5408	0
city	2020-11-05 13:03:00	Burlington Wildway Trail (from Salmon Hole to Ethan Allen Park), East Woods, Oakledge Park	1-2 times per month	greatly increased	5	greatly increased	1	Yes, increased	Just Getting Outside, Fresh Air, Exercise, Connecting to Nature, Contemplative Space, Peace and Quiet, Time with Family/Children, Socializing, Dog Walking	5401	0
city	2020-11-05 13:15:00	Burlington Wildway Trail (from Salmon Hole to Ethan Allen Park), Ethan Allen Park, Intervale/Ethan Allen Homestead	3-6 times per week	slightly increased	5	greatly increased	2	Yes, increased	Just Getting Outside, Fresh Air, Exercise, Connecting to Nature, Time with Family/Children, Birding	5408	0
city	2020-11-05 13:34:00	Crescent Woods	1-2 times per week	slightly increased	5	slightly increased	1	No, remained the same	Just Getting Outside, Fresh Air, Connecting to Nature, Peace and Quiet, Birding, Wildlife watching	5401	1
city	2020-11-05 15:00:00	Burlington Wildway Trail (from Salmon Hole to Ethan Allen Park), Ethan Allen Park, Intervale/Ethan Allen Homestead	3-6 times per week	slightly increased	5	greatly increased	2	Yes, increased	Just Getting Outside, Fresh Air, Exercise, Connecting to Nature, Time with Family/Children, Birding	5408	0
city	2020-12-05 06:14:00	Centennial Woods/Schmanska Park, Urban Reserve/311 North Avenue	1-2 times per week	slightly increased	5	slightly increased	2	No, remained the same	Just Getting Outside, Fresh Air, Exercise, Connecting to Nature, Contemplative Space, Peace and Quiet, Dog Walking	5408	4
city	2020-12-05 09:46:00	Centennial Woods/Schmanska Park, Urban Reserve/311 North Avenue	1-2 times per week	slightly increased	5	slightly increased	2	No, remained the same	Just Getting Outside, Fresh Air, Exercise, Connecting to Nature, Contemplative Space, Peace and Quiet, Dog Walking	5408	4
city	2020-12-05 09:47:00	Centennial Woods/Schmanska Park, Urban Reserve/311 North Avenue	1-2 times per week	slightly increased	5	slightly increased	2	No, remained the same	Just Getting Outside, Fresh Air, Exercise, Connecting to Nature, Contemplative Space, Peace and Quiet, Dog Walking	5408	4
city	2020-12-05 19:48:00	Arms Forest/Rock Point/North Beach, Derway Island/Mayes Landing, Northshore Natural Area/Starr Farm	3-6 times per week	no change	5	no change	4-Mar	Yes, decreased	Just Getting Outside, Fresh Air, Exercise, Connecting to Nature, Time with Family/Children, Dog Walking	5408	2
city	2020-12-05 21:22:00	Arms Forest/Rock Point/North Beach, Centennial Woods/Schmanska Park, Oakledge Park, Redstone Quarry	1-2 times per month	slightly increased	5	greatly increased	2	No, remained the same	Just Getting Outside, Fresh Air, Exercise, Connecting to Nature, Birding	5401	0
city	2020-12-05 21:53:00	Arms Forest/Rock Point/North Beach, Burlington Wildway Trail (from Salmon Hole to Ethan Allen Park), Ethan Allen Park, Intervale/Ethan Allen Homestead, Leddy Park, Mount Calvary Red Maple Wetland	1-2 times per week	slightly increased	5	greatly increased	1	No, remained the same	Just Getting Outside, Fresh Air, Connecting to Nature, Contemplative Space, Peace and Quiet, Birding	5401	0
city	2020-12-05 22:01:00	East Woods, Intervale/Ethan Allen Homestead, Red Rocks Park	1-2 times per month	greatly increased	5	greatly increased	4-Mar	No, remained the same	Exercise, Connecting to Nature, Contemplative Space, Time with Family/Children	5401	4
city	2020-12-05 22:09:00	East Woods, Oakledge Park, Shelburne Pond, Redrocks	1-2 times per month	greatly decreased	5	decreased	2	Yes, decreased	Just Getting Outside, Fresh Air, Connecting to Nature, Contemplative Space, Peace and Quiet	5403	0
city	2020-12-05 22:17:00	East Woods, Intervale/Ethan Allen Homestead, Leddy Park, Oakledge Park	1-2 times per week	slightly increased	5	slightly increased	2	No, remained the same	Just Getting Outside, Fresh Air, Exercise, Connecting to Nature, Contemplative Space, Peace and Quiet, Socializing, Dog Walking	5401	0
city	2020-12-05 22:38:00	Burlington Wildway Trail (from Salmon Hole to Ethan Allen Park), Ethan Allen Park	1-2 times per week	slightly increased	5	no change	1	Yes, decreased	Just Getting Outside, Fresh Air, Exercise	5446	0
city	2020-12-05 22:45:00	East Woods, Ti trail Shelburne, Stowe bike path, Williston bike path, Dorset park nature trail	Did not visit before COVID-19	greatly increased	5	greatly increased	Did not visit before COVID-19	Yes, increased	Just Getting Outside, Fresh Air, Exercise, Connecting to Nature, Peace and Quiet, Time with Family/Children, Socializing	5403	0
city	2020-12-05 23:25:00	Niquette Bay, Eagle mountain, Sand Bar, etc	1-2 times per week	greatly increased	5	slightly increased	2	No, remained the same	Just Getting Outside, Fresh Air, Exercise, Connecting to Nature, Time with Family/Children, I have children. They need to get out of the house.	5446	3
city	5/13/20 7:18	Arms Forest/Rock Point/North Beach, Burlington Wildway Trail (from Salmon Hole to Ethan Allen Park), Ethan Allen Park, Intervale/Ethan Allen Homestead, Pease Mountain	1-2 times per week	greatly increased	5	greatly increased	4-Mar	No, remained the same	Just Getting Outside, Fresh Air, Exercise, Connecting to Nature, Contemplative Space, Peace and Quiet, Time with Family/Children, Socializing, Dog Walking, Birding, Fishing	5408	2
city	5/13/20 7:23	Indian Brook Park, Essex	1-2 times per year	slightly increased	4	slightly increased	2	No, remained the same	Just Getting Outside, Fresh Air, Exercise, Time with Family/Children	5452	0
city	5/13/20 7:27	Autobahn	1-2 times per month	greatly increased	5	greatly increased	1	No, remained the same	Just Getting Outside, Fresh Air, Connecting to Nature, Contemplative Space, Peace and Quiet, Dog Walking	5462	0
city	5/13/20 8:32	Arms Forest/Rock Point/North Beach, Leddy Park, Oakledge Park	1-2 times per week	slightly decreased	5	slightly increased	5 or more	Yes, decreased	Just Getting Outside, Fresh Air, Exercise, Connecting to Nature, Contemplative Space, Socializing, Relaxation/recreation	5401	0
city	5/13/20 9:44	Arms Forest/Rock Point/North Beach, Burlington Wildway Trail (from Salmon Hole to Ethan Allen Park), Ethan Allen Park, Intervale/Ethan Allen Homestead, Leddy Park, Oakledge Park	1-2 times per week	slightly decreased	5	slightly increased	1	No, remained the same	Just Getting Outside, Fresh Air, Exercise, Connecting to Nature, Contemplative Space, Peace and Quiet, Time with Family/Children, Dog Walking	5408	0
city	5/13/20 11:41	Redstone Quarry	3-6 times per week	greatly increased	5	greatly increased	4-Mar	No, remained the same	Just Getting Outside, Fresh Air, Exercise, Connecting to Nature, Time with Family/Children, Birding	5401	0
city	5/13/20 11:43	East Woods, Intervale/Ethan Allen Homestead, Redstone Quarry	1-2 times per year	greatly increased	5	slightly increased	4-Mar	No, remained the same	Just Getting Outside, Fresh Air, Exercise, Connecting to Nature, Time with Family/Children, Birding	5401	0
city	5/13/20 12:05	Arms Forest/Rock Point/North Beach, Ethan Allen Park, Leddy Park, Pease Mountain	1-2 times per week	greatly increased	5	greatly increased	4-Mar	No, remained the same	Just Getting Outside, Fresh Air, Exercise, Connecting to Nature, Contemplative Space, Peace and Quiet, Time with Family/Children	5408	0
city	5/13/20 14:18	Arms Forest/Rock Point/North Beach, Burlington Wildway Trail (from Salmon Hole to Ethan Allen Park), Centennial Woods/Schmanska Park, Ethan Allen Park, Intervale/Ethan Allen Homestead, Leddy Park	Daily	slightly decreased	5	greatly increased	2	No, remained the same	Exercise, Connecting to Nature, Peace and Quiet, Time with Family/Children, Dog Walking	5401	0
city	5/13/20 15:43	Arms Forest/Rock Point/North Beach, Ethan Allen Park, Leddy Park, Pease Mountain	1-2 times per week	greatly increased	5	greatly increased	4-Mar	No, remained the same	Just Getting Outside, Fresh Air, Exercise, Connecting to Nature, Contemplative Space, Peace and Quiet, Time with Family/Children	5408	0
city	5/13/20 16:12	Arms Forest/Rock Point/North Beach, Intervale/Ethan Allen Homestead, Leddy Park, Oakledge Park	3-6 times per week	slightly increased	5	no change	1	Yes, decreased	Just Getting Outside, Fresh Air, Exercise, Connecting to Nature, Contemplative Space, Peace and Quiet	5401	0
city	5/13/20 16:27	Arms Forest/Rock Point/North Beach, Burlington Wildway Trail (from Salmon Hole to Ethan Allen Park), Centennial Woods/Schmanska Park, Ethan Allen Park, Intervale/Ethan Allen Homestead, Leddy Park, Oakledge Park, Salmon Hole Park	1-2 times per month	greatly increased	5	greatly increased	1	No, remained the same	Just Getting Outside, Fresh Air, Exercise, Connecting to Nature, Contemplative Space, Peace and Quiet	5401	2
city	5/13/20 17:15	Arms Forest/Rock Point/North Beach, Burlington Wildway Trail (from Salmon Hole to Ethan Allen Park), Centennial Woods/Schmanska Park, Ethan Allen Park, Intervale/Ethan Allen Homestead, Leddy Park, Long Pond/Sea Caves, Northshore Natural Area/Starr Farm, Oakledge Park	1-2 times per week	no change	5	greatly increased	2	No, remained the same	Just Getting Outside, Fresh Air, Exercise, Connecting to Nature, Peace and Quiet	5401	0
city	5/13/20 17:31	Burlington Wildway Trail (from Salmon Hole to Ethan Allen Park)	3-6 times per week	no change	5	no change	1	No, remained the same	Just Getting Outside, Fresh Air, Exercise, Connecting to Nature, Contemplative Space	5401	0
city	5/13/20 20:03	Arms Forest/Rock Point/North Beach, Leddy Park	3-6 times per week	slightly increased	5	greatly increased	5 or more	Yes, decreased	Just Getting Outside, Fresh Air, Exercise, Connecting to Nature, Contemplative Space, Peace and Quiet	5408	0
city	5/13/20 21:29	Arms Forest/Rock Point/North Beach, Ethan Allen Park, Intervale/Ethan Allen Homestead, Leddy Park	1-2 times per week	slightly increased	5	slightly increased	1	Yes, increased	Just Getting Outside, Fresh Air, Exercise, Connecting to Nature, Contemplative Space, Peace and Quiet	5408	4
city	5/14/20 6:52	Intervale/Ethan Allen Homestead, Leddy Park	1-2 times per year	no change	5	no change	4-Mar	Yes, decreased	Just Getting Outside, Fresh Air, Exercise, Connecting to Nature	5403	0
city	5/14/20 7:26	Arms Forest/Rock Point/North Beach, Burlington Wildway Trail (from Salmon Hole to Ethan Allen Park), Ethan Allen Park, Intervale/Ethan Allen Homestead, Long Pond/Sea Caves	1-2 times per week	greatly increased	5	greatly increased	4-Mar	No, remained the same	Just Getting Outside, Fresh Air, Exercise, Connecting to Nature, Contemplative Space, Peace and Quiet, Time with Family/Children, Biking & Running	5408	1
city	5/14/20 7:44	Arms Forest/Rock Point/North Beach, Ethan Allen Park, Urban Reserve/311 North Avenue	3-6 times per week	no change	5	slightly increased	4-Mar	No, remained the same	Just Getting Outside, Fresh Air, Exercise, Connecting to Nature, Contemplative Space, Peace and Quiet, Time with Family/Children, Socializing, Dog Walking	5408	1
city	5/14/20 16:24	Long Pond/Sea Caves	Daily	slightly increased	5	slightly increased	2	No, remained the same	Just Getting Outside, Fresh Air, Exercise, Connecting to Nature, Contemplative Space, Peace and Quiet, Time with Family/Children, Socializing, Birding	5401	0
city	5/14/20 17:50	Arms Forest/Rock Point/North Beach, Burlington Wildway Trail (from Salmon Hole to Ethan Allen Park), Centennial Woods/Schmanska Park, East Woods, Ethan Allen Park, Intervale/Ethan Allen Homestead, Leddy Park, Long Pond/Sea Caves, Oakledge Park, Salmon Hole Park, Shelburne Pond, Urban Reserve/311 North Avenue	3-6 times per week	slightly increased	5	slightly increased	1	Yes, decreased	Just Getting Outside, Fresh Air, Exercise, Connecting to Nature, Contemplative Space, Peace and Quiet, Fishing	5401	0
city	5/14/20 22:05	Colchester Bog, Derway Island/Mayes Landing, Ethan Allen Park, Intervale/Ethan Allen Homestead	1-2 times per year	greatly increased	5	greatly increased	1	Yes, increased	Just Getting Outside, Fresh Air, Exercise, Connecting to Nature, Contemplative Space, Peace and Quiet, Time with Family/Children	5408	0
city	5/15/20 9:13	Urban Reserve/311 North Avenue	1-2 times per month	slightly increased	5	slightly increased	4-Mar	No, remained the same	Just Getting Outside, Fresh Air, Exercise, Connecting to Nature, Time with Family/Children	5401	0
city	5/15/20 12:21	Burlington Wildway Trail (from Salmon Hole to Ethan Allen Park), Colchester Bog, Derway Island/Mayes Landing, Northshore Natural Area/Starr Farm, Redstone Quarry, Shelburne Pond, Urban Reserve/311 North Avenue	1-2 times per week	slightly increased	5	greatly increased	2	Yes, decreased	Exercise, Connecting to Nature, Contemplative Space, Peace and Quiet, Time with Family/Children	5408	0
city	5/15/20 16:22	Arms Forest/Rock Point/North Beach, Ethan Allen Park, Leddy Park, Pease Mountain	1-2 times per week	greatly increased	5	greatly increased	4-Mar	No, remained the same	Just Getting Outside, Fresh Air, Exercise, Connecting to Nature, Contemplative Space, Peace and Quiet, Time with Family/Children	5408	0
city	5/15/20 19:03	Burlington Wildway Trail (from Salmon Hole to Ethan Allen Park), Colchester Bog, Derway Island/Mayes Landing, Northshore Natural Area/Starr Farm, Redstone Quarry, Shelburne Pond, Urban Reserve/311 North Avenue	1-2 times per week	slightly increased	5	greatly increased	2	Yes, decreased	Exercise, Connecting to Nature, Contemplative Space, Peace and Quiet, Time with Family/Children	5408	0
city	5/16/20 12:01	Ethan Allen Park, Intervale/Ethan Allen Homestead, Northshore Natural Area/Starr Farm, Red Rocks
city	5/16/20 12:14	Arms Forest/Rock Point/North Beach, Urban Reserve/311 North Avenue	1-2 times per month	slightly increased	5	greatly increased	1	No, remained the same	Just Getting Outside, Fresh Air, Exercise, Connecting to Nature, Contemplative Space, Peace and Quiet	5401	0
city	5/16/20 15:05	Oakledge Park, Redstone Quarry, Shelburne Pond, Red Rocks	1-2 times per month	slightly decreased	5	greatly increased	4-Mar	Yes, decreased	Just Getting Outside, Fresh Air, Exercise, Connecting to Nature, Peace and Quiet, Time with Family/Children, Birding	5401	1
city	5/16/20 16:48	Burlington Wildway Trail (from Salmon Hole to Ethan Allen Park), Intervale/Ethan Allen Homestead	Daily	no change	5	no change	4-Mar	No, remained the same	Just Getting Outside, Fresh Air, Exercise	5408	0
city	5/16/20 19:39	Burlington Wildway Trail (from Salmon Hole to Ethan Allen Park), Centennial Woods/Schmanska Park, Derway Island/Mayes Landing, Ethan Allen Park, Intervale/Ethan Allen Homestead, Leddy Park, Mount Calvary Red Maple Wetland, Northshore Natural Area/Starr Farm, Oakledge Park	3-6 times per week	slightly increased	5	greatly increased	2	No, remained the same	Just Getting Outside, Fresh Air, Exercise, Connecting to Nature, Peace and Quiet, Birding	5408	3
city	5/17/20 8:34	Burlington Wildway Trail (from Salmon Hole to Ethan Allen Park), Derway Island/Mayes Landing, Ethan Allen Park	1-2 times per week	slightly increased	5	slightly increased	2	No, remained the same	Just Getting Outside, Fresh Air, Exercise, Connecting to Nature, Contemplative Space, Dog Walking	5408	0
city	5/17/20 11:46	Intervale/Ethan Allen Homestead, Leddy Park, Northshore Natural Area/Starr Farm, Oakledge Park, Redstone Quarry	1-2 times per week	slightly increased	5	greatly increased	5 or more	Yes, decreased	Just Getting Outside, Fresh Air, Exercise, Socializing, Fishing	5403	0
city	5/17/20 12:08	Arms Forest/Rock Point/North Beach, Ethan Allen Park, Intervale/Ethan Allen Homestead, Leddy Park	1-2 times per week	no change	5	greatly increased	2	No, remained the same	Just Getting Outside, Fresh Air, Exercise, Connecting to Nature, Peace and Quiet, Dog Walking	5408	0
city	5/17/20 12:31	Arms Forest/Rock Point/North Beach, Ethan Allen Park, Intervale/Ethan Allen Homestead, Leddy Park, Oakledge Park	1-2 times per month	greatly increased	4	slightly increased	4-Mar	No, remained the same	Just Getting Outside, Fresh Air, Time with Family/Children, Dog Walking	5401	0
city	5/17/20 12:58	Arms Forest/Rock Point/North Beach, Ethan Allen Park, Intervale/Ethan Allen Homestead, Leddy Park, Oakledge Park	1-2 times per week	slightly decreased	5	greatly increased	2	No, remained the same	Just Getting Outside, Fresh Air, Exercise, Connecting to Nature	5408	0
city	5/17/20 13:37	Intervale/Ethan Allen Homestead, Leddy Park, Northshore Natural Area/Starr Farm, Oakledge Park, Redstone Quarry	1-2 times per week	slightly increased	5	greatly increased	5 or more	Yes, decreased	Just Getting Outside, Fresh Air, Exercise, Socializing, Fishing	5403	0
city	5/17/20 14:00	Arms Forest/Rock Point/North Beach, Ethan Allen Park, Intervale/Ethan Allen Homestead, Leddy Park, Oakledge Park	1-2 times per week	slightly decreased	5	greatly increased	2	No, remained the same	Just Getting Outside, Fresh Air, Exercise, Connecting to Nature	5408	0
city	5/17/20 16:29	Oakledge Park, Salmon Hole Park, Casavant Natural Area (Winooski)	Daily	no change	5	greatly increased	1	No, remained the same	Exercise, Connecting to Nature, Contemplative Space, Dog Walking, Birding, Fishing	5401	3
city	5/17/20 19:13	Arms Forest/Rock Point/North Beach, Derway Island/Mayes Landing, Ethan Allen Park, Intervale/Ethan Allen Homestead, Leddy Park, Mount Calvary Red Maple Wetland, Oakledge Park, Redstone Quarry, Urban Reserve/311 North Avenue	1-2 times per week	greatly increased	5	greatly increased	1	No, remained the same	Just Getting Outside, Fresh Air, Exercise, Connecting to Nature, Contemplative Space, Peace and Quiet, Birding	5408	0
city	5/18/20 11:36	Ethan Allen Park, Intervale/Ethan Allen Homestead, Leddy Park, Long Pond/Sea Caves, Mount Calvary Red Maple Wetland, Northshore Natural Area/Starr Farm, Oakledge Park	3-6 times per week	slightly decreased	5	slightly increased	4-Mar	Yes, increased	Just Getting Outside, Fresh Air, Exercise, Connecting to Nature, Contemplative Space, Peace and Quiet, Time with Family/Children, Socializing, Birding	5408	3
city	5/18/20 18:03	Crescent Woods, Oakledge Park	1-2 times per year	greatly increased	5	slightly increased	2	No, remained the same	Just Getting Outside, Fresh Air, Exercise, Connecting to Nature, Dog Walking	5403	0
city	5/18/20 18:04	Crescent Woods	Did not visit before COVID-19	greatly increased	5	no change	2	No, remained the same	Just Getting Outside, Fresh Air, Exercise, Dog Walking	5403	0
city	5/18/20 18:08	Intervale/Ethan Allen Homestead, Leddy Park, Northshore Natural Area/Starr Farm, Oakledge Park, Redstone Quarry	1-2 times per week	slightly increased	5	greatly increased	5 or more	Yes, decreased	Just Getting Outside, Fresh Air, Exercise, Socializing, Fishing	5403	0
city	5/19/20 13:50	Arms Forest/Rock Point/North Beach, East Woods, Intervale/Ethan Allen Homestead, Leddy Park, Oakledge Park, Urban Reserve/311 North Avenue	1-2 times per month	slightly increased	5	slightly increased	1	Yes, decreased	Just Getting Outside, Fresh Air, Exercise, Connecting to Nature, Contemplative Space, Peace and Quiet	5401	0
city	5/19/20 17:02	Arms Forest/Rock Point/North Beach, East Woods, Ethan Allen Park, Intervale/Ethan Allen Homestead, Leddy Park, Oakledge Park	1-2 times per week	slightly increased	5	slightly increased	1	No, remained the same	Just Getting Outside, Fresh Air, Exercise, Peace and Quiet, Dog Walking	5401	0
city	5/19/20 17:25	Arms Forest/Rock Point/North Beach, Burlington Wildway Trail (from Salmon Hole to Ethan Allen Park), East Woods, Ethan Allen Park, Intervale/Ethan Allen Homestead, Salmon Hole Park	1-2 times per month	greatly increased	5	greatly increased	1	Yes, increased	Just Getting Outside, Fresh Air, Exercise, Connecting to Nature, Contemplative Space, Peace and Quiet, Time with Family/Children	5401	4
city	5/20/20 15:46	Arms Forest/Rock Point/North Beach	1-2 times per week	no change	5	slightly increased	2	No, remained the same	Just Getting Outside, Fresh Air, Exercise, Connecting to Nature, Peace and Quiet, Birding	5401	2
city	5/21/20 15:07	Arms Forest/Rock Point/North Beach, Burlington Wildway Trail (from Salmon Hole to Ethan Allen Park), Derway Island/Mayes Landing, Ethan Allen Park, Intervale/Ethan Allen Homestead, Northshore Natural Area/Starr Farm, Oakledge Park, Salmon Hole Park, Urban Reserve/311 North Avenue	1-2 times per week	slightly increased	5	greatly increased	4-Mar	Yes, decreased	Just Getting Outside, Fresh Air, Exercise, Connecting to Nature, Contemplative Space, Peace and Quiet, Time with Family/Children	5401	2
city	5/21/20 18:33	Arms Forest/Rock Point/North Beach	1-2 times per month	slightly increased	5	slightly increased	2	No, remained the same	Just Getting Outside, Fresh Air, Exercise, Connecting to Nature, Peace and Quiet	5408	0
city	5/21/20 18:46	Arms Forest/Rock Point/North Beach	1-2 times per month	slightly increased	5	slightly increased	2	No, remained the same	Just Getting Outside, Fresh Air, Exercise, Connecting to Nature, Peace and Quiet	5408	0
city	5/21/20 21:40	Ethan Allen Park, Oakledge Park	1-2 times per year	greatly increased	4	greatly increased	2	No, remained the same	Just Getting Outside, Fresh Air, Exercise, Connecting to Nature, Contemplative Space, Peace and Quiet, Time with Family/Children	5408	0
city	5/22/20 8:18	Arms Forest/Rock Point/North Beach	3-6 times per week	no change	5	no change	1	No, remained the same	Just Getting Outside, Fresh Air, Exercise, Dog Walking, Biking	5408	3
city	5/22/20 13:05	Burlington Wildway Trail (from Salmon Hole to Ethan Allen Park), Ethan Allen Park	1-2 times per week	slightly increased	5	slightly increased	4-Mar	Yes, decreased	Just Getting Outside, Fresh Air, Exercise, Peace and Quiet, Dog Walking	5403	0
city	5/22/20 14:44	Burlington Wildway Trail (from Salmon Hole to Ethan Allen Park), Ethan Allen Park	1-2 times per week	slightly increased	5	slightly increased	4-Mar	Yes, decreased	Just Getting Outside, Fresh Air, Exercise, Peace and Quiet, Dog Walking	5403	0
city	5/22/20 15:23	Arms Forest/Rock Point/North Beach, Ethan Allen Park	3-6 times per week	slightly decreased	5	slightly increased	2	No, remained the same	Just Getting Outside, Fresh Air, Exercise, Time with Family/Children	5408	0
city	5/22/20 18:52	Arms Forest/Rock Point/North Beach, Derway Island/Mayes Landing, Ethan Allen Park, Intervale/Ethan Allen Homestead, Leddy Park, Urban Reserve/311 North Avenue	1-2 times per month	slightly increased	5	slightly increased	1	No, remained the same	Just Getting Outside, Fresh Air, Exercise, Connecting to Nature, Contemplative Space, Peace and Quiet, Birding	5408	0
city	5/22/20 22:23	Mount Calvary Red Maple Wetland, Northshore Natural Area/Starr Farm	3-6 times per week	no change	5	no change	Unknown	Yes, decreased	Just Getting Outside, Fresh Air, Connecting to Nature, Contemplative Space, Dog Walking, Birding	5408	3
city	5/23/20 15:47	Arms Forest/Rock Point/North Beach, Oakledge Park, Shelburne Pond	1-2 times per year	greatly increased	5	slightly increased	4-Mar	Yes, decreased	Just Getting Outside, Fresh Air, Exercise, Connecting to Nature, Contemplative Space, Peace and Quiet, Time with Family/Children, Biking	5401	1
city	5/23/20 17:13	Arms Forest/Rock Point/North Beach, Winooski River walk	1-2 times per week	slightly increased	5	greatly increased	4-Mar	Yes, decreased	Just Getting Outside, Fresh Air, Exercise, Connecting to Nature, Contemplative Space, Peace and Quiet, Time with Family/Children	5404	2
city	5/23/20 19:51	Burlington Wildway Trail (from Salmon Hole to Ethan Allen Park), Colchester Bog, Intervale/Ethan Allen Homestead, Shelburne Pond	1-2 times per week	slightly increased	4	slightly increased	4-Mar	Yes, decreased	Just Getting Outside, Fresh Air, Exercise, Peace and Quiet, Time with Family/Children, Socializing, Birding	5403	3
city	5/23/20 23:26	Arms Forest/Rock Point/North Beach, Winooski River walk	1-2 times per week	slightly increased	5	greatly increased	4-Mar	Yes, decreased	Just Getting Outside, Fresh Air, Exercise, Connecting to Nature, Contemplative Space, Peace and Quiet, Time with Family/Children	5404	2
city	5/24/20 15:37	Arms Forest/Rock Point/North Beach, Ethan Allen Park, Leddy Park, Oakledge Park	1-2 times per week	slightly increased	5	greatly increased	1	No, remained the same	Just Getting Outside, Fresh Air, Exercise, Connecting to Nature, Contemplative Space, Peace and Quiet, Time with Family/Children, Socializing	5401	0
